1  
2  
3  
4  
5  
6  
7  
8  
9  
10  
11  
12  
13  
14  
15  
16  
17  
18  
19  
20  
21

**“Original Article submitted to BioRxiv”**

**Secondary metabolites and the antimicrobial potential of five different *Coleus* species in response to salinity stress**

**Divya Kotagiri, Khasim Beebi Shaik, Viswanatha Chaitanya Kolluru\***

Department of Biotechnology, GITAM Institute of Technology, GITAM University, Visakhapatnam, 530045, Andhra Pradesh, India.

**\*Corresponding Author**

Dr. K.V.Chaitanya  
Associate Professor  
Department of Biotechnology,  
GITAM Institute of Technology,  
GITAM University,  
Visakhapatnam- 530045.  
INDIA  
**Tel:** +91-891-2840246  
**Fax:** +91-891-2790399  
**Email:** [viswanatha.chaitanya@gmail.com](mailto:viswanatha.chaitanya@gmail.com)

## 22 **Abstract**

23 Salinity is one of the major abiotic stresses that affects the growth and productivity of plants. The  
24 presence of soluble salts at high concentration near the root system restricts the uptake of water  
25 by plants. Plants grown under saline conditions possess higher amounts of secondary metabolites  
26 compared with those grown under normal conditions. The use of traditional medicine to treat  
27 infectious diseases is increasing day by day throughout the world. Developing novel drugs with  
28 antimicrobial potential from the source of medicinal plants is receiving attention to replace the  
29 use of synthetic drugs and to combat the growth of multi-drug resistant strains. Thus screening of  
30 medicinal plant extracts is carried out to evaluate their antimicrobial potency. The present study  
31 aimed at determining the secondary metabolites and antimicrobial potential of leaf, stem and root  
32 ethanol and chloroform extracts of five different *Coleus* species; *C.aromaticus*, *C.amboinicus*,  
33 *C.barbatus*, *C.forskohlii* and *C.zeylanicus* subjected to salinity stress. The up regulation in the  
34 content of plant bioactive compounds along with the antimicrobial activities of ethanol and  
35 chloroform extracts under the influence of salinity stress have been observed during the study in  
36 *Coleus*. The leaf, stem and root extracts of all the five *Coleus* species showed good anti-  
37 microbial activity against the tested pathogenic strains. The leaf extracts of *Coleus* showed  
38 higher inhibitory activity compared to the stem and root extracts. Ethanol extracts showed higher  
39 anti-microbial activity ranging from 1.5-100 mg/ml compared with the chloroform extracts  
40 ranging from 0.97-250 mg/ml respectively. The study revealed that the increased antimicrobial  
41 activity with increasing salinity might be due to the up regulation of secondary metabolites. The  
42 leaf, stem and root extracts of *Coleus* showed effective antimicrobial activity against the  
43 pathogenic strains even under saline conditions is due to the up regulation of secondary  
44 metabolites which provides a scope of developing novel drugs to treat infectious diseases.

45 **Keywords:** Salinity, antimicrobial, bioactive compounds, minimum inhibitory concentration,

46 *Coleus*

47

48

49

50

51

52

53

54

55

56

57

58

59

60

61

62

## 63 **Introduction**

64 Infections caused by various bacterial and fungal pathogens are becoming a major threat to  
65 public health of the growing population in the developing countries. Usage of improper and  
66 synthetic medicines, mismanagement and maladministration of antibiotics along with the  
67 microbial mutations is leading to the development of multi-drug resistant pathogenic strains  
68 along with the side effects, enabling to search for the novel compounds with resistance to the  
69 emerging new strains (Thuy et al. 2016). Apart from the misuse of antibiotics, multi-drug  
70 resistant strains acquire resistance by several mechanisms like target site modification, metabolic  
71 inactivation and the efflux pumps expression leading to the antibiotic efflux (Yala et al. 2001;  
72 Hooper 2001). The emergence of new pathogens accounting for many infectious diseases along  
73 with the antibiotic resistance and increasing failure of chemotherapy is the largest causes of  
74 death in tropical countries. Unavailability of vaccines for most of these diseases enables the  
75 discovery of novel natural antibacterial agents for efficient treatment against infectious diseases.  
76 Plants synthesize a variety of secondary metabolites with potential anti-inflammatory,  
77 antimicrobial and antioxidant properties. The different parts of the plant like leaf, root, stem,  
78 flower, fruit, twigs etc. can be used as antimicrobial agents due to the presence of secondary  
79 metabolites (Seyyednejad et al. 2010). Secondary metabolites such as flavonoids, alkaloids,  
80 tannins and phenolic compounds provide protection against bacteria, fungi, viruses and insects  
81 used for the discovery and the development of novel drugs (Ghazghazi et al. 2015). The search  
82 of the plants with the efficient antioxidative defense system as well as capable of producing  
83 secondary metabolites with strong antimicrobial properties is being received much attention as a  
84 replacement for synthetic drugs. Since ancient times, plants with effective medicinal values have  
85 been used as the promising sources for the treatment of various ailments due to the presence of

86 phytochemicals with therapeutic properties, which are the cheapest and safe alternative sources  
87 (Odeja et al. 2015).

88 Plants are frequently subjected to a variety of harsh environmental stresses such as scarcity of  
89 water, extreme temperatures, high soil salinity, herbivore attack, and pathogen infection  
90 diminishing their productivity (Sewelam et al. 2016). Salinity refers to the presence of different  
91 salts like sodium chloride, calcium sulphates, magnesium and bicarbonates in water and soil  
92 (Ouda 2008). Due to excessive use of fertilizers, irrigation with low quality water and  
93 desertification, cultivated soils are getting more saline worldwide (Ramadoss et al. 2013). Soil  
94 lands with high level of salt concentrations induces physiological and metabolic changes in  
95 plants affecting their seed germination, growth, development, yield and also decreases the rate of  
96 respiration and photosynthesis in plants. The uptake of water and absorption of essential  
97 nutrients by plants is restricted due to the presence of soluble salts exerting high osmotic  
98 pressure which ultimately affects the growth of plants (Tester and Devenport 2003). In addition  
99 to the growth and yield, the composition of bioactive compounds present in the aromatic and  
100 medicinal plants is affected by salinity (Gil et al. 2002). The increased levels of plant secondary  
101 metabolites such as phenols, flavonoids, tannins, alkaloids etc... under the influence of increased  
102 salt concentrations as a part of defence mechanism have been reported (Kate 2008). The  
103 preliminary screening of phytochemicals gives an idea about the type of compounds produced by  
104 plants and their quantification both under normal and saline conditions will be useful in  
105 extracting the compounds of interest in pure form followed by the identification of those  
106 metabolites in order to detect their significance in human health.

107 Medicinal plants are good sources of various secondary metabolites belong to the class of natural  
108 anti-oxidants useful in curing many diseases and as free radical scavengers (Wong et al. 2006,

109 Adom et al. 2005). The presence of bioactive compounds is mainly responsible for anti-  
110 inflammatory and antioxidant properties of medicinal plants can be used as potential chemo  
111 preventives. Secondary metabolites or plant bioactive compounds are low molecular weight  
112 compounds distributed largely in plants play a major role in the adaptation of plants to different  
113 environmental changes and in overcoming stress constraints also used in neutralizing free  
114 radicals. The colour, smell, flavour and the defence mechanism against pathogens in plants is  
115 due to the presence of phytochemicals (Aziagba et al. 2017). The phenolic components such as  
116 flavonoids, phenolic acids and phenolic diterpenes are mainly responsible for antioxidative  
117 activity in medicinal plants due to redox properties involved in neutralizing free radicals,  
118 decomposing peroxides, quenching singlet and triplet oxygen (Lee et al. 2004; Ksouri et al.  
119 2007). The concentration of bio-active compounds produced by plants depends mainly upon the  
120 growth conditions and especially under stress conditions influence the metabolic pathways leads  
121 to the accumulation of related natural compounds possess activity to scavenge reactive oxygen  
122 species (ROS). The common response observed in salt-stressed plants are the generation of ROS,  
123 highly reactive responsible in damaging cell structures, nucleic acids, lipids and proteins  
124 (Vaidyanathan et al. 2003). Plants possess medicinal value with anti-inflammatory and anti-  
125 microbial activities; acquire resistance to stress induced ROS is due to the presence of several  
126 bio-active compounds (Foyer et al. 1994).

127 The presence of phenolic compounds in medicinal plants is responsible for antimicrobial, anti-  
128 inflammatory, anti-thrombotic, vasodilatory, cardio protective and anti-allergic properties  
129 (Balasundram et al. 2006). The synthesis and accumulation of polyphenols are stimulated in  
130 response to salinity stress resulting in considerable variations in their quantity and quality.  
131 Flavonoids are one of the important classes of plant secondary metabolites protects plants from

132 harmful UV rays and also from herbivores capable of transferring electrons to free radicals and  
133 to chelate and activate the enzymes with anti-oxidant properties inhibits free radical producing  
134 enzymes. The biological properties such as anti-viral, anti-malarial and the cholesterol synthesis  
135 inhibition are due to the presence of terpenoids (Indumathi et al. 2014). Thus the salt stressed  
136 medicinal plants can be used for economic purposes as they are a potential source of bioactive  
137 compounds (Valifard et al. 2014). The major phytoconstituents of *Coleus* reported so far are  
138 flavonoids, glycosides, phenolic and volatile compounds, but the quantitative analysis of  
139 secondary metabolites during salinity stress are less explored.

140 The presence of bio-active compounds in the leaf, stem and root extracts of *Coleus* possessing  
141 the property of antimicrobial activity have potential to damage ROS and the activity of free  
142 radicals, helps to maintain proper health by combating infectious diseases. The presence of ROS  
143 can react readily and oxidize various biomolecules like lipids, carbohydrates, DNA and proteins,  
144 mainly responsible for the human diseases such as ulcers, inflammation, autoimmune disorders  
145 and viral infections (Surh and Ferguson 2003). Medicinal plants are used in many countries to  
146 treat diseases as they are rich sources of compounds possessing antimicrobial property. More  
147 than 80% of world population depend on traditional medicine for their health care needs reported  
148 by WHO (World health organization) (Malleswari et al. 2017). Depending upon the type of  
149 solvent used, plant extracts can be administered to the patients either as raw or tisanes, nebulisate  
150 and as tinctures. Medicinal plants with secondary metabolites are capable of inducing specific  
151 physiological actions on the human body (Joshi and Parle 2006) and are a source of antioxidant  
152 (Nahak and Sahu 2010; Pandey and Madhuri 2010) and antimicrobial compounds  
153 (Maragathavalli et al. 2012; Sharma et al. 2012).

154 Genus *Coleus* is a perennial branched aromatic herb that belongs to the family of  
155 “*Lamiaceae*” can be grown indoor as well as outdoor possesses biological activity against  
156 various infectious diseases and a number of pharmacological effects. Five *Coleus* species  
157 considered for the study and cultivated are *C.aromaticus*, *C.amboinicus*, *C.forskohlii*, *C.barbatus*  
158 and *C.zeylanicus*. *Coleus aromaticus* possess antioxidant and anti-microbial properties and the  
159 leaves are used to treat cholera, diarrhoea, malarial fever, halitosis, convulsions, epilepsy,  
160 asthma, cough, flatulence, bronchitis, hepatopathy, anorexia, cephalgia, otalgia, dyspepsia,  
161 colic, hiccough, and strangury (Warrier et al. 1995). *Coleus forskohlii* is an aromatic herb grown  
162 under tropical to temperate conditions produces diterpenoid from its tuberous root called  
163 forskolin. It is used to treat painful urination, hypertension, insomnia, convulsions, eczema,  
164 respiratory disorders and congestive heart failure. It also possesses therapeutic features of curing  
165 asthma, psoriasis and cancer. Forskolin is used to prevent blood clotting helps in nerve  
166 regeneration, activates adenylate cyclase enzyme and to reduce the intraocular pressure in  
167 glaucoma. The root extracts of *Coleus forskohlii* is used to treat eczema and skin infections, also  
168 used to kill worms in the stomach. *C.forskohlii* used widely for curing several disorders like  
169 intestinal disorders, respiratory disorders, heart diseases, asthma, bronchitis, convulsions,  
170 insomnia, burning sensation, epilepsy and constipation (Ammon and Muller 1985). *C.forskohlii*  
171 is found to be effective in treating obesity, congestive heart failure, hypertension, psoriasis,  
172 glaucoma, asthma, depression and cancer metastasis. Apart from the medicinal value of this  
173 plant, *forskohlii* also contains essential oils used in the food industries as flavouring agents and  
174 as an anti-microbial compound (Chowdhary and Sharma 1998). *C.amboinicus* is considered as  
175 carminative, lactagogue, analgesic, anti-septic and anti-pyretic. The leaf extracts of  
176 *C.amboinicus* is used to treat headache, toothache, bites, burns and also effective against malaria



177 parasite. *C.barbatus* is a perennial, succulent branched fleshy herb grows up to the height of 15-  
178 40 cm between 1000-2600 m altitudes above sea level used as a stimulant in the treatment of  
179 cough. The aerial parts of the plant have cytotoxic, anti-tumour and diuretic activities, also used  
180 in the treatment of gums and teeth disorders. The major active compounds present in this plant  
181 were diterpenes, triterpenes, tormentic acid,  $\alpha$ - amyirin and the flavones 3,7 dimethyl quercetin,  
182 sitosterol and kumatakinin. *Coleus zeylanicus* has astringent and stomachic properties used in the  
183 treatment of fever, common cold, asthma, dysentery, diarrhoea, vomiting, burning sensation,  
184 small pox, eye diseases, worm diseases, chronic ulcers, dental diseases and thirst. The different  
185 parts of the plant like leaf, root and stem are rich in medicinal value. In the present study, efforts  
186 have been made to evaluate the antimicrobial potential of *Coleus* leaf, root and stem ethanol and  
187 chloroform extracts under normal and saline conditions.

## 188 **Materials and methods**

### 189 ***Coleus* plants & salinity stress treatment**

190 Five *Coleus* species, *aromaticus*, *amboinicus*, *zeylanicus*, *forskohlii* and *barbatus* were  
191 propagated in the GITAM University botanical garden in 12 inch pots under 720 minutes natural  
192 photoperiod [Irradiance (400-700 nm) of 1600-1800  $\mu$  mols  $m^{-2} s^{-1}$ ] with day/night temperatures  
193 of 30°C/23°C with an approximate air humidity of 60%. The pots were arranged in rows 1 m  
194 apart and the plants were irrigated daily. Three months old plants with uniform growth were  
195 selected for this study. *Coleus* plants of all varieties were then separated into four groups, namely  
196 control (0), mild (100 mM), moderate (200 mM) and severe (300 mM). Control plants were  
197 watered daily and salt-stressed plants were treated with 250 ml of 100, 200 and 300 mM NaCl  
198 solutions twice a day for a period of 1 week. Third or fourth leaf from the top of the plant was  
199 collected for all the experiments.

## 200 **Quantitative estimation of secondary metabolites**

### 201 **Estimation of Phenols**

202 Phenols estimated spectrophotometrically using Folin-Ciocalteu reagent which gives a blue  
203 colour complex measured at 650 nm. 0.5 g tissue was homogenized in 80% ethanol and  
204 centrifuged for 20 min at 10,000×g. The extracts were pooled together after repeated extraction  
205 with 80% ethanol and allowed to dry. The residue obtained was dissolved in 5 ml of distilled  
206 water. 2 ml of the aliquot was made up to 5 ml with distilled water and 0.5 ml of 1N Folin-  
207 Ciocalteu reagent and 2 ml of 20% Na<sub>2</sub>CO<sub>3</sub> were added and incubated in a boiling water bath  
208 exactly for 1 minute. After cooling, absorbance of the samples was measured at 650 nm (Malick  
209 and Singh 1980).

### 210 **Estimation of Flavonoids**

211 Flavonoids were estimated according to Chang et al. 2002. 0.5 grams of plant material were  
212 added to 5 ml of 8% methanol and extracted for 48 h by shaking at room temperature and  
213 centrifugation at 10,000×g for 20 min. To 0.5 ml of extract, 1.5 ml of methanol, 0.1 ml of 10%  
214 aluminium chloride, 0.1 ml of 1 M potassium acetate and 2.8 ml of distilled water were added  
215 and incubated at room temperature for 30 minutes. Absorbance of the samples measured at the  
216 wavelength of 415 nm.

### 217 **Estimation of Tannins:**

218 Tannins were estimated according to Polshettiwar et al. 2007 by the addition of 0.5 g *Coleus*  
219 tissue to 25 ml of distilled water and incubated at 100°C for 30 minutes, centrifuged at 10,000×g  
220 for 20 min. To 1 ml of extract, 1 ml of Folin-Denis reagent and 2 ml of sodium carbonate  
221 solutions were added and the volume was made up to 5 ml with distilled water, incubated at

222 room temperature for 30 minutes and the absorbance was measured at 700 nm. Tannic acid was  
223 used as a standard for the preparation of calibration curve.

#### 224 **Estimation of Anthraquinones**

225 Anthraquinone content in the *Coleus* was determined by adding 0.05 g of dried tissue in 50 ml of  
226 distilled water extracted by shaking for 16 h. The contents were incubated at 70°C and 50 ml of  
227 50% methanol was added and filtered. Absorbance of the filtrate was measured at 450 nm.  
228 Calibration standards were prepared using alizarin and purpurin at a concentration of 0.01 mg  
229 per 1 ml (Soladoye and Chukwuma 2012).

#### 230 **Estimation of Alkaloids**

231 Alkaloid content was estimated by adding 100 mg of dried *Coleus* tissue to 40 ml of 95% ethanol  
232 refluxed for about half an hour and then filtered. The volume of the filtrate was adjusted to 50  
233 ml with 95% ethanol and subjected to evaporation. The residue obtained was treated with 3 ml of  
234 1N Hcl and allowed to stand for 2 h hydrolysis. 3 ml of 1N NaOH was added, followed by the 2  
235 ml concentrated acetic acid and the volume being adjusted to 10 ml with distilled water. 1 ml of  
236 this solution was made up to 5 ml with 20% acetic acid and added to 5 ml of acetate buffer, 1 ml  
237 of 0.05% methyl orange and 5 ml chloroform. After few minutes chloroform layers are  
238 withdrawn, added with a pinch of Na<sub>2</sub>SO<sub>4</sub> and the absorbance was measured at 420 nm.  
239 Solasodine was used as standard for calibration (Muthumani et al. 2010).

#### 240 **Estimation of Terpenes:**

241 Terpenes were estimated spectrophotometrically by adding 10 ml of petroleum ether to 1 gram of  
242 leaf, stem and root powder and extracted with shaking for 15 min. The extract was filtered and  
243 the absorbance was measured at 420 nm (Mboso et al. 2013).

#### 244 **Estimation of Steroids:**

245 Estimation of steroids was done by adding 2 ml of 4N H<sub>2</sub>SO<sub>4</sub>, 2 ml of 0.5% FeCl<sub>3</sub> and 0.5 ml of  
246 0.5% potassium hexa cyanoferrate to 1 ml of methanolic extract. The contents were incubated at  
247 70°C for 30 min, allowed to cool and made up to the volume of 10 ml with distilled water.  
248 Absorbance of the samples was measured at 780 nm (Narendra et al. 2013).

#### 249 **Estimation of Saponins:**

250 Saponins were estimated according to Brunner 1984. 1 g of fine powdered sample was weighed  
251 accurately and added to 100 ml of isobutyl alcohol and extracted with shaking for 5 h and then  
252 filtered. To the filtrate, 20 ml of 40% saturated magnesium carbonate solution was added and  
253 again subjected to filtration through a filter paper; a clear colourless filtrate was obtained. To 1  
254 ml of the filtrate, 2 ml of 5% FeCl<sub>3</sub> solution was added and the volume made up to 50 ml with  
255 distilled water. The contents were allowed to stand for 30 minutes at room temperature to  
256 develop a deep red colour and the absorbance of the samples was measured at 380 nm. A  
257 calibration curve was prepared using dioxgenin concentrations ranging from 0-100 µg.

#### 258 **Estimation of Cardiac glycosides:**

259 1 g of *Coleus* tissue powder was added to 10 ml of 70% alcohol and extracted for 2-3 h followed  
260 by the filtration. 4 ml of the filtrate was added to 5 ml of 12.5% lead acetate and the volume  
261 made up to 50 ml with distilled water. The solution was again filtered and 5 ml of 4.77%

262 disodium hydrogen orthophosphate was added to 25 ml of filtrate resulting in the formation of  
263 precipitate removed by a third round of filtration. A 5 ml of freshly prepared Buljet's reagent  
264 was added to 5 ml of clear solution obtained after filtration and incubated at room temperature  
265 for 1 h. The absorbance of the samples was measured at 595 nm and the calibration curve was  
266 prepared using 0.02% Digitoxin dissolved in chloroform-methanol at the ratio of 1:1 v/v (El-  
267 olemy et al. 1994).

### 268 **Estimation of Lignins:**

269 Estimation of lignins was done by weighing 100 mg of dry *Coleus* tissue and 1 ml of 72%  
270 sulphuric acid was added, incubated at 30°C for 1h with occasional stirring. 28 ml of distilled  
271 water was added and the beaker was incubated at 120°C for 1 h. The contents were filtered and  
272 the residue obtained after filtration was dried overnight at 105°C and determined the weight  
273 (AIR) whereas the filtrate obtained measured at 205 nm (ASL) (Kent et al. 1988).

274 Acid-insoluble Residue (AIR)

$$AIR = \frac{m}{M} * 1000mg/g$$

275 Where m= weight of the residue after drying

276 M= Oven dry weight of the sample before acid hydrolysis.

277 Acid-Soluble Lignin (ASL)

$$ASL = \frac{A * D * V}{a * b * M} * 1000mg/g$$

278 Where A=Absorbance,

279 D=Dilution factor,

280 V=Volume of the filtrate,

281 a=Extinction co-efficient of lignin,  
282 b=Cuvette path length and  
283 M=Oven dry weight of the sample before acid addition.  
284 Total Lignin Content = AIR+ASL.

### 285 **Preparation of extracts for anti-microbial activity**

286 *Coleus* leaves, root and stem samples were washed thoroughly under running tap water and then  
287 with distilled water to remove the dirt and to reduce the microbial load. The plant materials were  
288 air-dried under shade away from sunlight for 4-5 days, made into a fine powder using mortar and  
289 pestle. Extracts were prepared using polar solvent ethanol and non-polar solvent chloroform at a  
290 concentration of 10 g in 100 mL of solvent, allowed for the extraction of secondary metabolites  
291 with vigorous shaking for 48-72 h. The extracts were filtered and concentrated using Rota-  
292 evaporator which can be further diluted to the required concentration in DMSO used for  
293 assessing their anti-microbial activities by studying minimum inhibitory concentration (MIC)  
294 against bacterial strains *Escherichia coli* (MTCC 1652), *Staphylococcus aureus* (MTCC 3160),  
295 *Pseudomonas aeruginosa* (MTCC 1688), *Bacillus cereus* (MTCC 430) and fungal strains  
296 *Aspergillus niger* (MTCC 282), *Aspergillus flavus* (MTCC 873), *Fusarium oxysporum* (MTCC  
297 6659) and *Rhizopus stolonifer* (MTCC 2591) obtained from Microbial Type Culture Collection  
298 Centre, Institute of Microbial Technology (IMTECH), Chandigarh, India.

### 299 **Preparation of Inoculum**

300 The colonies of test organisms grown overnight were inoculated into 0.85% normal saline and  
301 the turbidity adjusted to 0.5 Mc Farland using the standard which is equal to  $1.5 \times 10^8$  CFU/ml. It  
302 was further diluted to obtain the final inoculum of  $5 \times 10^5$  CFU/ml.

## 303 **Determination of antimicrobial activity by minimum inhibitory concentration (MIC)**

### 304 **method**

305 MIC was performed as per Clinical and Laboratory Standards Institute guidelines using *Coleus*  
306 extracts against bacterial and fungal pathogens in a 96 well u-bottomed microtitre plates using p-  
307 iodonitrotetrazolium violet as an indicator dye. The ethanol and the chloroform extracts of  
308 *Coleus* was serially diluted from the concentration of 500 mg/ml to 0.02 mg/ml and then added  
309 with the final inoculum of  $5 \times 10^5$  CFU/ml. The anti-microbial compound and the final inoculum  
310 were in the ratio of 1:1 (v/v). Each test performed in triplicate with positive and negative  
311 controls. After the addition of inoculum, plates were sealed with aluminium foil and incubated at  
312 37°C for 24 h in the case of bacterial cultures and for 48 h at 28°C for fungal cultures  
313 respectively in an incubator. At the end of incubation period, the wells were added with 40 µL of  
314 0.2 mg/ml p-iodonitrotetrazolium violet dye and incubated for 30 minutes for the colour  
315 development. Presence of bacterial or fungal growth is indicated by a change in the colour of the  
316 medium to red, whereas no colour change indicates the absence of growth of the organism and  
317 the least concentration where there is no growth is considered as an MIC value of that particular  
318 compound against bacterial and fungal strains used. Ampicillin and Fluconazole were used as  
319 standards.

### 320 **Statistical analysis**

321 Results mentioned are reported as the mean  $\pm$  standard error (SE) values of five independent  
322 experiments, conducted on five different plants in each experiment. SE values were calculated  
323 directly from the data according to standard methods (Taylor 1982). Data analysis was carried

324 out using the SPSS package. Mean values were compared by Duncan's multiple range test and  
325 *P*-values which are less than or equal to 0.05 were considered as statistically significant.

## 326 **Results**

327 Quantitative determination of ten different secondary metabolites namely phenols, flavonoids,  
328 tannins, lignins, alkaloids, steroids, cardiac glycosides, anthraquinones, terpenes and saponins  
329 were carried out in leaf, stem and root samples of *Coleus* species (Fig. 1-10). The range of  
330 secondary metabolites in leaf, stem and root of *Coleus* species was found to be 0.75-3.82 mg/g  
331 for phenols, 0.3-0.95 mg/g for flavonoids, 0.88-2.62 mg/g for tannins, 0.11-2.4 mg/g for cardiac  
332 glycosides, 0.14-0.94 mg/g for anthraquinones, 11.4-31% for lignins, 3.91-6.2 mg/g for steroids,  
333 0.9-3.82 mg/g for saponins, 2.3-9.2 mg/g for alkaloids and 123-315 mg/g for terpenes. The  
334 concentration of bioactive compounds varies among the species and within the species under  
335 saline conditions. The amount of plant bioactive compounds increased with the increasing  
336 concentration of NaCl up to the optimum level and the amount decreased with the increasing  
337 concentrations of NaCl beyond the optimum level. In the present study, the content of secondary  
338 metabolites in *Coleus* has increased under mild (100 mM), moderate (200 mM) and severe (300  
339 mM) salinity treatment (Fig. 1-10). Thereafter, decrease in the level of secondary metabolites at  
340 the concentration above 300 mM NaCl is noticed and the experiment was designed considering  
341 the salinity treatment up to a concentration of 300 mM NaCl. The maximum increase in the level  
342 of bio-active compounds was observed at a concentration of 300 mM NaCl. The content of  
343 terpenes was found to be higher in all the five *Coleus* species compared to other bioactive  
344 compounds. The concentration of the majority of the secondary metabolites were found to be  
345 high in leaf samples of *Coleus* followed by stem and root, whereas few bioactive compounds  
346 were high in stem compared to leaf and root of *Coleus* species.



347 The effect of salt stress on anti-microbial activity of five different *Coleus* species, namely  
348 *C.aromaticus*, *C.barbatus*, *C.amboinicus*, *C.forskohlii* and *C.zeylanicus* ethanol and chloroform  
349 extracts against four bacterial strains *Escherichia coli*, *Bacillus cereus*, *Staphylococcus aureus*,  
350 *Pseudomonas aeruginosa*, and four fungal strains *Aspergillus niger*, *Aspergillus flavus*, *Rhizopus*  
351 *stolonifer* and *Fusarium oxysporum* is depicted in Table 1-2. The leaf, stem and root extracts of  
352 all the five *Coleus* species showed good anti-microbial activity against tested pathogenic strains  
353 by inhibiting their growth. The leaf extracts of *Coleus* showed higher inhibitory activity against  
354 tested strains followed by the stem and root extracts. Ethanol extracts showed high anti-microbial  
355 activity ranging from 1.5-100 mg/ml compared with the chloroform extracts ranging from 0.97-  
356 250 mg/ml against tested bacterial and fungal pathogens respectively and the activity increased  
357 with increasing salinity due to the up regulation of secondary metabolites whereas for few  
358 species of *Coleus* against few tested strains, the activity remained to be the same as control  
359 values. *Bacillus cereus* was highly susceptible bacterium whose activity was inhibited at a  
360 concentration of 1.5 mg/ml and 0.97 mg/ml by *Coleus forskohlii* ethanol and chloroform extracts  
361 whereas, *A.niger* was the highly susceptible fungus inhibited by *Coleus zeylanicus* and *Coleus*  
362 *forskohlii* leaf extracts at a concentration of 0.39 mg/ml respectively. Among the five different  
363 *Coleus* species used in the study, *C.forskohlii* showed high anti-microbial activity both under  
364 normal and saline conditions followed by *C.zeylanicus*.

## 365 **Discussion**

366 Medicinal plants produce a large number of secondary metabolites with several biological  
367 properties. The presence of polyphenols and their up regulation during stress play a key role in  
368 the plant defense mechanisms. An extensive study on phytoconstituents has been made in five  
369 different species of *Coleus* leaf, stem and root tissues subjected to salinity stress. The increase in

370 the content of phenolic compounds with increased salinity was observed during the study and our  
371 data is supported by the findings of Valifard et al. (2014); reported the increased total phenolic  
372 compounds in the leaf samples of medicinal, aromatic plant *Saliva mirzayanii* under salinity  
373 stress. The increased total phenol under moderate salinity stress in the red pepper plant was  
374 reported (Navarro et al. 2006). In our present study, the increase in the content of secondary  
375 metabolites is seen in leaf, stem and root samples of *Coleus* under salinity stress, whereas, the  
376 concentration of secondary metabolites were found to be high in leaf of *Coleus* followed by stem  
377 and root. The increase in the content of phenolic compounds with increased salinity in different  
378 parts of the plant was reported (Muthukumarasamy et al. 2000). The growth of the plant during  
379 salinity stress is reduced due to the accumulation of toxic ions,  $\text{Na}^+$  and  $\text{Cl}^-$  (Marosz and Nowak  
380 2008). The increase in the vacuolar volume mediates directional expansion causes primary plant  
381 cell growth and also facilitates the osmotic adjustment essential for cellular development by  
382 compartmentalization of  $\text{Na}^+$  and  $\text{Cl}^-$  (Shuji et al. 2002). By decreasing the leaf area, plant tries to  
383 cope with the condition of abiotic stress thereby conserving the energy. The plant potassium  
384 nutrition is disrupted by the sodium ions at the surface of root because of the similarity between  
385 potassium and the sodium ions; the uptake of potassium by root system is strongly inhibited. The  
386 uptake of potassium by plants take place either by the high affinity or low affinity system, but  
387 generally plants undergo high affinity potassium uptake system during salinity stress to maintain  
388 appropriate potassium nutrition to maintain enzyme activities, cell turgor and membrane  
389 potential as the deficiency leads to the reduced plant growth.

390 Plants when exposed to abiotic stress like salinity stress, their growth will be reduced and  
391 generate a high oversupply of reduction equivalents. The massive amounts of  $\text{NADPH}^+$ ,  $\text{H}^+$   
392 (strong reduction power) enhance the synthesis of compounds like alkaloids or phenols and

393 isoprenoids which are highly reduced. The massive generation of oxygen radicals and the  
394 damage by photo-inhibition is prevented by the accumulated secondary metabolites or natural  
395 products of plants affected by stress (Xin et al. 2011). The enhanced levels of secondary  
396 metabolites during salinity stress might be due to the inductions in enzymatic activity favouring  
397 the production of different bioactive compounds. The presence of alkaloids in *Coleus* might be  
398 responsible for anti-malarial, analgesic activity and its use in the treatment of stomach disorders.  
399 Similar results of higher alkaloid content in the salinity treated plants of *C.roseus* compared to  
400 control plants were reported (Abdul et al. 2008). Tannins used to heal inflamed mucous  
401 membrane and wounds due to its astringent property. Bioactive compounds like terpenes,  
402 steroids and saponins possess cardiac and hypertensive depressant activity. Terpenoids possess  
403 anti-cancer properties, promotes apoptosis. The concentration of terpenoids was found to be high  
404 in *Coleus* plant which might be the reason of anti-cancer potential. Similar range of 216.67 to  
405 350 mg/g terpenoids were reported in *Ocimum* (Vimala et al. 2014). The presence of cardiac  
406 glycosides found to be effective in congestive heart failure (Aboaba et al. 2001). Flavonoids are  
407 one of bioactive compounds accumulate and trigger the synthesis of substances with defensive  
408 role. The anti-viral, anti-inflammatory and antioxidative properties of medicinal plants are due to  
409 the presence of flavonoids, which are used to treat several conditions like diabetes, ulcers,  
410 rheumatic fever and hypertension. Kidney disorders and stomach problems can be cured with the  
411 use of plant polyphenols (Vimala and Francis 2015). The presence and the composition of  
412 different bioactive compounds in medicinal plants is controlled both at the environmental and  
413 genetic level (Awika and Rooney 2004). The demand for the use of medicinal plants rich in  
414 phenolics in food industries is increasing because of their ability to improve the quality and  
415 nutritional value of foods. These compounds contain hydroxyl groups which can degrade lipids

416 and scavenge free radicals (Naima Saeed et al. 2012). The laxative property of anthraquinones is  
417 generally used in pulp bleaching for production of paper as it is a building block for most of the  
418 dyes (Soladoye and Chukwuma 2012). The important role of conducting water in the stem of  
419 plants is done by lignins. From our study, it was observed that all the five *Coleus* species were  
420 tolerant to salinity stress, acquiring resistance to salinity by the accumulation of secondary  
421 metabolites thereby providing the osmotic balance to the plant and by protecting the cells,  
422 preventing the damage caused by the generation of oxygen radicals.

423 In recent years, a number of multi-drug resistant strains have developed by expressing resistant  
424 genes due to the improper usage of antibiotics. To avoid this problem, there is a need to develop  
425 new alternate drugs to eradicate the pathogenic population. Medicinal plant extracts with  
426 antimicrobial activity can be used as a desirable tool to eradicate the population of pathogenic  
427 strains, particularly in the treatment of infectious, dreadful diseases and in food spoilage. The  
428 initial step for the discovery of new drugs with antimicrobial potential is the screening of plant  
429 extracts (Cseke et al. 2016). Among the different parts of the plant, leaf is considered to be one  
430 of the highest accumulator regions for compounds used generally for therapeutic needs (Jagtap et  
431 al. 2009). In the present study, control, mild, moderate and severe NaCl treated species of *Coleus*  
432 leaf, root and stem ethanol and chloroform extracts were tested against four bacterial strains and  
433 four fungal strains, which have inhibited their growth. Antimicrobial activities of *Coleus* extracts  
434 might be due the presence of various bioactive compounds exhibiting antiviral, antimicrobial,  
435 anti-inflammatory and antioxidant properties. *Coleus* leaf, stem and root extracts have shown  
436 effective antimicrobial activity against gram positive, gram negative and fungal strains used in  
437 the study which indicates the presence of antimicrobial compounds exhibiting broad spectrum  
438 activity. The activity of microbial growth inhibition increased with increased salinity is due to

439 the up regulation of plant bioactive compounds. The difference in the antimicrobial activity of  
440 leaf, stem and root extracts of *Coleus* is due to the difference in the composition and the  
441 concentration of phytochemicals present within a particular tissue. The effect of salt stress and  
442 the type of solvent used for the extraction also influence the antimicrobial activity. The anti-  
443 microbial activity varies with the species to species or within the species is due to variations in  
444 the secondary metabolite profiles and various other factors like climatic and environmental  
445 changes. The response of plants to produce one metabolite over the other is due to the effect of  
446 different stress factors. The composition of plant secondary metabolites is altered due to the  
447 difference in the level of carbon dioxide, altitude and the presence of pathogenic microbes and  
448 insects (William et al. 2016). The inhibitory effect of *Coleus* leaf, root and stem ethanol and  
449 chloroform extracts on the tested bacterial strains ranged from 250-1.5 mg/ml, whereas, against  
450 fungal strains MIC values ranged from 150-0.39 mg/ml respectively. Similar results of  
451 antimicrobial activity of *Coleus barbatus* ethanol and chloroform extracts against the strains of  
452 *S.aureus* and *P.aeruginosa* were reported by Abhishek et al. (2011). The inhibitory activity at a  
453 concentration of 100 mg/ml against the strains of *E.coli* and *S.aureus* by *Moringa oleifera* leaf  
454 ethanol extract was reported by Ibrahim et al. (2015). Jacqueline et al. (2017) reported the  
455 antifungal activity of *Coleus* species methanol extracts against the strains of *Aspergillus*,  
456 *Rhizopus*, *Mucor*, *Rodotorula*, *Geotricum*, *Brasidiobolus*, *Trichophyton*, *Microsporum*,  
457 *Epidermophyton* and *Candida* support our study which states the antifungal potential of *Coleus*  
458 extracts. The presence of secondary metabolites in *Coleus* species plays a major role in  
459 protecting the plant from stress also responsible for the anti-microbial activity. It was believed  
460 that the extracts exhibit antimicrobial potential of causing damage to the nucleotides with  
461 increased spatial division and by genetic material condensation (Thilagavathi et al. 2016). The

462 action of bioactive compounds on microbes might be due to the interference of bacterial cell wall  
463 peptidoglycan biosynthesis and by inhibiting protein synthesis, nucleic acid synthesis, act as  
464 chelating agents, inhibiting the metabolic pathway, disrupting the peptide bonds and preventing  
465 the microbes to utilize the available nutrients. The leaf extracts of *Coleus* showed potent  
466 inhibitory activity compared to stem and root might be due to the presence of number of  
467 bioactive compounds with antimicrobial property. The secondary metabolites are generally  
468 deposited in different parts of the plant in different proportions of an individual plant as the  
469 production of phytochemicals in leaves is expected to be higher compared to the other parts of  
470 the plant (Clarice et al. 2017). The growth and the metabolism of microorganisms are inhibited  
471 by the interference of the active components present within a bio-active compound (Aboaba et  
472 al. 2006). *Bacillus cereus* was found to be the most susceptible bacterium inhibited at a  
473 concentration of 0.97 mg/ml by *Coleus forskohlii*. Similar results of inhibitory activity on  
474 *Bacillus cereus* were reported by Abdelaaty et al. (2017). The difference in the antimicrobial  
475 activity between gram positive and gram negative strains is due to the difference in the  
476 composition of the cell wall. The extracts penetrate through the mesh like peptidoglycan layer of  
477 gram-positive microorganisms, whereas the penetration of extracts in gram negative strains is  
478 difficult as they possess outer lipopolysaccharide membrane. *Coleus* extracts effectively  
479 inhibited gram negative strains responsible for several infectious diseases in humans, therefore  
480 *Coleus* plant is considered to have high therapeutic value can be used in developing novel  
481 antimicrobial drugs to overcome the usage of conventional antibiotics. Many researchers have  
482 reported the broad spectrum antimicrobial activity of flavonoids, alkaloids, polyphenols and  
483 tannins. The tannins act by forming complex with polysaccharides, inactivating the enzymes,  
484 preventing microbial adhesion and precipitating the proteins (Prashant et al. 2017). From the

485 above results, the whole *Coleus* plant is a good source of terpenoids, flavonoids and other  
486 secondary metabolites suggests the use of this herb in food and pharmaceutical industries. It was  
487 clear that the *Coleus* extracts possess metabolites effective in killing pathogenic microbes which  
488 can be used in the preparation of traditional medicine for therapy against several diseases.

## 489 **Conclusions**

490 From the above results, it was clear that all the five *Coleus* species are capable of surviving  
491 during salinity stress up to the optimum levels of NaCl treatment with specific time period and  
492 with the up regulation of secondary metabolites possessing nutraceutical and pharmaceutical  
493 value for the development of new anti-microbial drugs against multi-drug resistant pathogenic  
494 strains to address unmet therapeutic needs. In addition, under salinity stress, an increase in the  
495 content of different bioactive compounds appears to be involved in the response of *Coleus* to  
496 NaCl stress and their presence responsible for the anti-microbial, anti-oxidant and anti-  
497 inflammatory properties of this medicinal plant. Thus, this medicinal plant can be considered in  
498 the development of new alternative traditional drugs in order to cure most dreadful diseases  
499 caused by the multi-drug resistant strains.

## 500 **Acknowledgements**

501 Research lab of K.V. Chaitanya is funded by the grants from the University grants commission  
502 (UGC), Govt. of India, 42-197/2013. Divya is thankful for the UGC research fellowship.

## 503 **References**

- 504 Abdelaaty A, Shahat, Elsayed A, Mahmoud, Abdullah A, Al-Mishari, Mansour S, Alsaid. 2017.  
505 Antimicrobial activities of some Saudi Arabian Herbal plants. African Journal of  
506 Traditional Complementary and Alternative Medicine. 14(2), 161-165.
- 507 Abdul Jaleel C, Beemarao S, Ramalingam S, Rajaram P. 2008. Soil salinity alters growth,  
508 chlorophyll content, and secondary metabolite accumulation in *Catharanthus roseus*.  
509 Turkish Journal of Biology. 32, 79-83.
- 510 Abhishek M, Rakshanda B, Prasad GBKS, Dua VK. 2011. *Coleus barbatus* as a Potent  
511 Antimicrobial Agent against Some Gastro-Intestinal Pathogens. Journal of Life Sciences.  
512 3(2), 137-140.
- 513 Aboaba OO, Smith SI, Olide FO. 2006. Antimicrobial Effect of Edible Plant Extract on  
514 *Escherichia coli* 0157:H7. Pakistan Journal of Nutrition. 5, 325-327.
- 515 Aboaba OO, Efuwape BM. 2001. Antibacterial properties of some Nigerian species. Biophysical  
516 Research Communications. 13, 183-188.
- 517 Adom KK, Sorrells ME, Liu RH. 2005. Phytochemicals and antioxidant activity of milled  
518 fractions of different wheat varieties. Journal of Agricultural and Food Chemistry. 53,  
519 2297-2306.
- 520 Ammon HP, Muller AB. 1985. Forskolin: from an Ayurvedic remedy to a modern agent. *Planta*  
521 *Medica*. 6, 473-477.
- 522 Awika JM, Rooney LW. 2004. Sorghum phytochemicals and their potential impact on human  
523 health. *Phytochemistry*. 65, 1199-1221.
- 524 Aziagba BO, Okeke CU, Ezeabara AC, Ilodibia CV, Ufele AN, Egboka TP. 2017. Determination  
525 of the Flavonoid Composition of Seven Varieties of *Vigna unguiculata* (L.) Walp as  
526 Food and Therapeutic Values. *Universal Journal of Applied Science*. 5(1), 1-4.



- 527 Balasundram N, Sundram K, Samman S. 2006. Phenolic compounds in plants and agri industrial  
528 by-products: antioxidant activity, occurrence, and potential uses. *Food Chemistry*. 99,  
529 191-203.
- 530 Brunner JH. 1984. Direct spectrophotometric determination of Saponins. *Analytical Chemistry*.  
531 34, 1314-1326.
- 532 Chang C, Yang M, Wen H, Chern J. 2002. Estimation of total flavonoid Content in *propolis* by  
533 two complementary colorimetric methods. *Journal of Food and Drug analysis*. 10, 178-  
534 182.
- 535 Chowdhary AR, Sharma ML. 1998. GC-MS investigations on the essential oil from *Coleus*  
536 *forskohlii* Briq. *Indian perfumer*. 42, 15-16.
- 537 Clarice P, Mudzengi, Amon M, Musa T, Chrispen M, Joan V, Burumu, Tinyiko H. 2017.  
538 Antibacterial activity of aqueous and methanol extracts of selected species used in  
539 livestock health management. *Pharmaceutical Biology*. 55(1), 1054-1060.
- 540 Cseke LJ, Kirakosyan A, Kaufman PB, Warber S, Duke JA, Briemann HL. 2016. Natural  
541 products from plants. CRC Press.
- 542 El-olemy MM, Al-muhtadi FJ, Afifi AFA. 1994. *Experimental Phytochemistry. A laboratory*  
543 *manual*. 21-27.
- 544 Foyer CH, Lelendais M, Kunert KJ. 1994. Photooxidative stress in plants. *Physiologia*  
545 *Plantarum*. 92, 696-717.
- 546 Ghazghazi H, Chedia A, Moufida W, Faten T, Abderrazak M, Brahim H. 2015. Chemical  
547 composition of *Ruta chalepensis* leaves essential oil and variation in biological activities.  
548 *Journal of Essential Oil Bearing Plants*. 18, 3.

- 549 Gil A, De La Fuente EB, Lenardis AE, Loopez Pereira M, Suaorez SA, Bandoni A, Van Baren  
550 C, Di Leo Lira P, Ghersa CM. 2002. Coriander essential oil composition from two  
551 genotypes grown in different environmental conditions. *Journal of Agricultural Food*  
552 *Chemistry*. 50, 2870-2877.
- 553 Hooper DC. 2001. Emerging mechanisms of fluoroquinolone resistance. *Emerging Infectious*  
554 *Diseases Journal*. 7, 337-341.
- 555 Ibrahim SA, Idris AN, Abayomi S, Fatima Y, Auwal AA, Ismail AH. 2015. Phytochemical  
556 Screening and Antimicrobial Activities of Ethanolic Extracts of *Moringa oleifera Lam* on  
557 Isolates of Some Pathogens. *Journal of Applied Pharmaceutical Science*. 7; 4.
- 558 Indumathi C, Durgadevi G, Nithyavani S, Gayathri PK. 2014. Estimation of terpenoid content  
559 and its antimicrobial property in *Enicostemma littorale*. *International Journal of Chem*  
560 *Tech Research*. 6(9), 4264-4267.
- 561 Jacqueline ET, Christian UI. 2017. Evaluation of Anti-fungal Activity of *Coleus* Species  
562 Extracts. *International Journal of Current Research in Biosciences and Plant Biology*.  
563 4(1), 131-138.
- 564 Jagtap NS, Khadabadi SS, Ghorpade DS, Banarase NB, Naphade SS. 2009. Antimicrobial and  
565 antifungal activity of *Centella asiatica* (L.) Urban, Umbeliferae. *Research Journal of*  
566 *Pharmacy and Technology*. 2(2), 328-330.
- 567 Joshi H, Parle M. 2006. Cholinergic basis of memory improving effect of *Ocimum tenuiflorum*  
568 Linn. *Indian Journal of Pharmaceutical Science*. 68(3), 364-365.
- 569 Kate VV. 2008. Physiological and biochemical studies in some medicinal plants: *Tribulus*  
570 *terrestris L.* and *Pedaliium murex L.* Ph. D. Thesis submitted to Shivaji University,  
571 Kolhapur, Maharashtra, India.

- 572 Kent T, Kirk, John R, Obst. 1988. Lignin Determination. *Methods in Enzymology*. 161, 87-110.
- 573 Ksouri R, Megdiche V, Debez A, Falleh H, Grignon C, Abdelly C. 2007. Salinity effects on  
574 polyphenol content and antioxidant activities in leaves of the halophyte *Cakile maritima*.  
575 *Plant Physiology and Biochemistry*. 45, 244-249.
- 576 Lee JC, Lee KY, Kim J, Na CS, Jung NC, Chung GH, Jang YS. 2004. Extract from *Rhus*  
577 *verniciiflua* stokes is capable of inhibiting the growth of human lymphoma cells. *Food*  
578 *and Chemical Toxicology*. 42(9), 1383-1388.
- 579 Malick CP, Singh MB. 1980. In: *Plant Enzymology and Histoenzymology*. Kalyani Publishers.  
580 286.
- 581 Malleswari D, Mohd KM, Rana K, Bagyanarayana G. 2017. Antibacterial and Antifungal  
582 Activity of Leaf, Stem and Root Extracts of *Costus Igneus*. *Research Journal of*  
583 *Pharmaceutical, Biological and Chemical Sciences*. 8; 2314.
- 584 Maragathavalli S, Brindha S, Kaviyarasi NS, Annadurai BB, Gangwar SK. 2012. Antimicrobial  
585 activity in leaf extract of Neem (*Azadirachta indica* Linn.). *International Journal of*  
586 *Science and Nature*. 3(1); 110-113.
- 587 Marosz A, Nowak J.S. 2008. Effect of salinity stress on growth and macro elements uptake of  
588 four tree species. *Dendrobiology*. 59, 23-29.
- 589 Mboso OE, Eyong EU, Odey MO, Osakwe E. 2013. Comparative phytochemical screening of  
590 *Ereromastax speciosa* and *Ereromastax polysperma*. *Journal of Natural Product and*  
591 *Plant Resources*. 3, 37-41.
- 592 Muthukumarasamy M, Gupta SD, Pannerselvam R. 2000. Enhancement of peroxidase,  
593 polyphenol oxidase and superoxide dismutase activities by tridimefon in NaCl stressed  
594 *Raphanus sativus* L. *Biology of Plant*. 43, 317-320.

- 595 Muthumani P, Meera R, Sweetlin, Devi P. 2010. Phyto Chemical Investigation and  
596 Determination of Crude Alkaloidal Content (Solasodine) in *Solanum Leave Dunal* (Dry  
597 and Fresh Berries). International Journal of Pharmaceutical & Biological Archives. 1,  
598 350-354.
- 599 Nahak G, Sahu RK. 2010. *In-vitro* antioxidative activity of *Azadirachta indica* and *Melia*  
600 *azedarach* leaves by DPPH scavenging assay. Natural Science. 8(4), 22-28.
- 601 Naima S, Muhammad RK, Maria S. 2012. Antioxidant activity, total phenolic and total flavonoid  
602 contents of whole plant extracts *Torilis leptophylla L.* BMC Complementary and  
603 Alternative Medicine. 12, 221.
- 604 Narendra D, Ramalakshmi N, Satyanarayana B, Sudeepthi P, Hemachakradhar K, Pavankumar  
605 raju N. 2013. Preliminary Phytochemical Screening, Quantitative estimation and  
606 Evaluation of anti-microbial activity of *Alstoniamacrophylla* Stem bark. International  
607 Journal of Science Inventions Today. 2, 31-39.
- 608 Navarro JM, Flores P, Garrido C, Martinez V. 2006. Changes in the contents of antioxidant  
609 compounds in pepper fruits at ripening stages, as affected by salinity. Food Chemistry.  
610 96, 66-73.
- 611 Odeja O, Grace O, Christiana EO, Elias EE, Yemi O. 2015. Phytochemical Screening,  
612 Antioxidant and Antimicrobial activities of *Senna occidentalis* (L.) leaves Extract.  
613 Clinical Phytoscience. 1, 6.
- 614 Ouda SAE, Mohamed SG, Khalil FA. 2008. Modelling the effect of different stress conditions on  
615 maize productivity using yield-stress model. International Journal of Natural and  
616 Engineering Sciences. 2, 57-62.

- 617 Pandey G, Madhuri S. 2010. Pharmacological activities of *Ocimum sanctum* (Tulsi): A Review.  
618 International Journal of Pharmaceutical Sciences Review and Research. 5(1); 61-66.
- 619 Polshettiwar SA, Ganjiwale RO, Wadher SJ, Yeole PG. 2007. Spectrophotometric estimation of  
620 total tannins in some Ayurvedic eye drops. Indian Journal of Pharmaceutical Science.  
621 69, 574-576.
- 622 Prashant A, Mehta JP. 2017. A review on antimicrobial and Himalayan medicinal plants.  
623 Environment Conservation Journal. 18; 49-62.
- 624 Ramadoss D, Lakkineni VK, Bose P, Ali S, Annapurna K. 2013. Mitigation of salt stress in  
625 wheat seedlings by halo tolerant bacteria isolated from saline habitats. Springer Plus. 2,  
626 1-7.
- 627 Sewelam N, Kemel K, Peer MS. 2016. Global plant stress signalling: Reactive oxygen species at  
628 the cross-road. Frontiers of Plant Science. 7, 187.
- 629 Seyyednejad SM, Motamedi H. 2010. A review on native medicinal plants in Khuzestan, Iran  
630 with antibacterial properties. International Journal of Pharmaceutics. 6, 551-60.
- 631 Sharma A, Meena A, Meena R. 2012. Antimicrobial activity of plant extract of *Ocimum*  
632 *tenuiflorum*. International Journal of Pharma Tech Research. 4(1); 176-180.
- 633 Shuji Y, Ray AB, Paul MH. 2002. Salt stress tolerance of plants. JIRCAS Working Report. 25-  
634 33.
- 635 Soladoye MO, Chukwuma EC. 2012. Quantitative phytochemical profile of the leaves of *Cissus*  
636 *populnea* Guill. & Perr. (Vitaceae) – An important medicinal plant in central Nigeria.  
637 Scholars Research Library. Archives of Applied Science Research. 4, 200-206.
- 638 Surh YZ, Ferguson LR. 2003. Dietary and medicinal antimutagens and anticarcinogens.  
639 Molecular mechanisms and chemopreventive potential-highlight of a symposium.

- 640 Taylor JR. 1982. An Introduction to Error Analysis. The Study of Uncertainties in Physical  
641 Measurements. University Science Books, Sausalito, CA, USA.
- 642 Tester M, Davenport R. 2003. Na<sup>+</sup> tolerant and Na<sup>+</sup> transport in higher plants. Annals of  
643 Botany. 91, 503-527.
- 644 Thilagavathi S, Hariram N. 2016. *Coleus aromaticus* Benth Synthesis of Potentially  
645 Nanomedicine as High Nutritive Value of Human Health and Immunomodulator.  
646 International Journal of Science and Research Methodology. 4(4); 18-38.
- 647 Thuy TV, Hyungrok K, Vu KT, Quang LD, Hoa TN, Hun K, In Seon K, Gyung JC, Jin-Cheol K.  
648 2016. In vitro antibacterial activity of selected medicinal plants traditionally used in  
649 Vietnam against human pathogenic bacteria. BMC Complementary and Alternative  
650 Medicine. 16; 32.
- 651 Valifard M, Mohsenzadeh S, Kholdebarina B, Rowshanb V. 2014. Effects of salt stress on  
652 volatile compounds, total phenolic content and antioxidant activities of *Salvia*  
653 *mirzayanii*. South African Journal of Botany. 93, 92-97.
- 654 Vimala G, Francis GS. 2015. Qualitative and quantitative determination of secondary  
655 metabolites and antioxidant potential of *ficus benghalensis* linn seed. International  
656 Journal of Pharmacy and Pharmaceutical Sciences. 7(7).
- 657 Vimala V, Rebecca Mathew, P, Deepa S, Kalaivani T. 2014. Phytochemical analysis in *ocimum*  
658 accessions. International Journal of Pharmacy and Pharmaceutical Sciences. **6(1)**.
- 659 Warriar PK, Nambiar VP, Ramankutty C. 1995. Indian Medicinal Plants. Orient Longman Ltd.,  
660 Madras.

- 661 William PCB, Raquel OR, Demetrio LV, Juliana JMP. 2016. Bioactive metabolite profiles and  
662 antimicrobial activity of ethanolic extracts from *Muntingia calabura* L. leaves and stems.  
663 Asian Pacific Journal of Tropical Biomedicine. 6(8), 682-685.
- 664 Wong CC, Li HB, Cheng KW, Chen F. 2006. A systematic survey of antioxidant activity of 30  
665 Chinese medicinal plants using the ferric reducing antioxidant power assay. Food  
666 Chemistry. 97, 705-711.
- 667 Xin ZL, Mei G, Shiqing L, Shengxiu L, Zongsuo L. 2011. Modulation of plant growth, water  
668 status and antioxidative system of two maize (*Zea mays* L.) cultivars induced by  
669 exogenous glycinebetaine under long term mild drought stress. Pakistan Journal of  
670 Botany. 43, 1587-1594.
- 671 Yala D, Merad AS, Mohamedi D, Ouar Korich MN. 2001. Classification et mode d'action des  
672 antibiotiques. Médecine du Maghreb. 91, 5-12.
- 673
- 674
- 675
- 676
- 677
- 678
- 679
- 680
- 681
- 682
- 683

684 **Figure legends:**

685 **Fig. 1.** Quantitative determination of phenols in leaf, stem and root of five different *Coleus*  
686 species under normal and saline conditions. Each point is an average of five independent  
687 determinations  $\pm$  SE, ( $t_{(4)} = 0.1, p \geq 0.05$ ).

688 **Fig. 2.** Quantitative determination of flavonoids in leaf, stem and root of five different *Coleus*  
689 species under normal and saline conditions. Each point is an average of five independent  
690 determinations  $\pm$  SE, ( $t_{(4)} = 0.10, p \geq 0.05$ ).

691 **Fig. 3.** Quantitative determination of tannins in leaf, stem and root of five different *Coleus*  
692 species under normal and saline conditions. Each point is an average of five independent  
693 determinations  $\pm$  SE, ( $t_{(4)} = 0.28, p \geq 0.05$ ).

694 **Fig. 4.** Quantitative determination of anthraquinones in leaf, stem and root of five different  
695 *Coleus* species under normal and saline conditions. Each point is an average of five independent  
696 determinations  $\pm$  SE, ( $t_{(4)} = 0.32, p \geq 0.05$ ).

697 **Fig. 5.** Quantitative determination of alkaloids in leaf, stem and root of five different *Coleus*  
698 species under normal and saline conditions. Each point is an average of five independent  
699 determinations  $\pm$  SE, ( $t_{(4)} = 0.46, p \geq 0.05$ ).

700 **Fig. 6.** Quantitative determination of terpenes in leaf, stem and root of five different *Coleus*  
701 species under normal and saline conditions. Each point is an average of five independent  
702 determinations  $\pm$  SE, ( $t_{(4)} = 3.14, p \geq 0.05$ ).



703 **Fig. 7.** Quantitative determination of steroids in leaf, stem and root of five different *Coleus*  
704 species under normal and saline conditions. Each point is an average of five independent  
705 determinations  $\pm$  SE, ( $t_{(4)} = 0.92, p \leq 0.05$ ).

706 **Fig. 8.** Quantitative determination of saponins in leaf, stem and root of five different *Coleus*  
707 species under normal and saline conditions. Each point is an average of five independent  
708 determinations  $\pm$  SE, ( $t_{(4)} = 0.4, p \leq 0.05$ ).

709 **Fig. 9.** Quantitative determination of cardiac glycosides in leaf, stem and root of five different  
710 *Coleus* species under normal and saline conditions. Each point is an average of five independent  
711 determinations  $\pm$  SE, ( $t_{(4)} = 0.1, p \leq 0.05$ ).

712 **Fig. 10.** Quantitative determination of lignins in leaf, stem and root of five different *Coleus*  
713 species under normal and saline conditions. Each point is an average of five independent  
714 determinations  $\pm$  SE, ( $t_{(4)} = 0.80, p \leq 0.05$ ).

715

716

717

718

719

720

721

722

723 **Table 1.** Anti-microbial activity of *Coleus* ethanol leaf, stem & root extracts in mg/ml.

| Plant species            | Plant part          | Strain name              | MIC Values mg/ml |               |          |        |       |
|--------------------------|---------------------|--------------------------|------------------|---------------|----------|--------|-------|
|                          |                     |                          | Control          | Mild          | Moderate | Severe |       |
| <i>Coleus aromaticus</i> | Leaf                | <i>E.coli</i>            | 100              | 100           | 100      | 100    |       |
|                          |                     | <i>S.aureus</i>          | 100              | 100           | 100      | 100    |       |
|                          |                     | <i>B.cereus</i>          | 50               | 50            | 50       | 50     |       |
|                          |                     | <i>P.aeruginosa</i>      | 100              | 100           | 100      | 100    |       |
|                          |                     | <i>A.niger</i>           | 6.25             | 3.12          | ≤ 1      | ≤ 1    |       |
|                          |                     | <i>A.flavus</i>          | 100              | 50            | 50       | 50     |       |
|                          |                     | <i>F.oxysporum</i>       | 50               | 50            | 3.12     | 3.12   |       |
|                          |                     | <i>R.stolonifer</i>      | 50               | 25            | ≤ 2      | ≤ 2    |       |
|                          |                     | Stem                     | <i>E.coli</i>    | 125           | 125      | 125    | 31.25 |
|                          | <i>S.aureus</i>     |                          | 125              | 125           | 125      | 31.25  |       |
|                          | <i>B.cereus</i>     |                          | 50               | 50            | 50       | 50     |       |
|                          | <i>P.aeruginosa</i> |                          | 125              | 125           | 125      | 125    |       |
|                          | <i>A.niger</i>      |                          | 125              | 125           | 62.5     | 31.25  |       |
|                          | <i>A.flavus</i>     |                          | 62.5             | 31.25         | 31.25    | 15.62  |       |
|                          | <i>F.oxysporum</i>  |                          | 125              | 125           | 62.5     | 62.5   |       |
|                          | <i>R.stolonifer</i> |                          | 62.5             | 31.25         | 3.91     | 3.91   |       |
|                          | Root                |                          | <i>E.coli</i>    | 125           | 125      | 125    | 62.5  |
|                          |                     | <i>S.aureus</i>          | 125              | 125           | 125      | 62.5   |       |
|                          |                     | <i>B.cereus</i>          | 125              | 125           | 62.5     | 31.25  |       |
|                          |                     | <i>P.aeruginosa</i>      | 125              | 125           | 125      | 125    |       |
|                          |                     | <i>A.niger</i>           | 125              | 125           | 62.5     | 62.5   |       |
|                          |                     | <i>A.flavus</i>          | 62.5             | 31.25         | 31.25    | 31.25  |       |
|                          |                     | <i>F.oxysporum</i>       | 125              | 125           | 62.5     | 62.5   |       |
|                          |                     | <i>R.stolonifer</i>      | 62.5             | 31.25         | 31.25    | 15.26  |       |
|                          |                     | <i>Coleus amboinicus</i> | Leaf             | <i>E.coli</i> | 100      | 100    | 100   |
|                          | <i>S.aureus</i>     |                          |                  | 25            | 25       | 25     | 25    |
|                          | <i>B.cereus</i>     |                          |                  | 100           | 100      | 100    | 50    |
| <i>P.aeruginosa</i>      | 100                 |                          |                  | 100           | 100      | 50     |       |
| <i>A.niger</i>           | 100                 |                          |                  | 50            | 50       | 50     |       |
| <i>A.flavus</i>          | 100                 |                          |                  | 100           | 100      | 100    |       |
| <i>F.oxysporum</i>       | 100                 |                          |                  | 100           | 50       | 50     |       |
| <i>R.stolonifer</i>      | 100                 |                          |                  | 50            | 25       | 25     |       |
| Stem                     | <i>E.coli</i>       |                          |                  | 100           | 100      | 100    | 50    |
|                          | <i>S.aureus</i>     |                          | 50               | 50            | 25       | 25     |       |
|                          | <i>B.cereus</i>     |                          | 100              | 50            | 50       | 50     |       |
|                          | <i>P.aeruginosa</i> |                          | 250              | 125           | 125      | 62.5   |       |
|                          | <i>A.niger</i>      |                          | 125              | 125           | 125      | 62.5   |       |
|                          | <i>A.flavus</i>     |                          | 62.5             | 62.5          | 31.25    | 31.25  |       |
|                          | <i>F.oxysporum</i>  |                          | 125              | 125           | 125      | 62.5   |       |

|                          |                     |                     |               |       |       |       |
|--------------------------|---------------------|---------------------|---------------|-------|-------|-------|
|                          |                     | <i>R.stolonifer</i> | 125           | 62.5  | 31.25 | 31.25 |
| Root                     |                     | <i>E.coli</i>       | 125           | 125   | 125   | 62.5  |
|                          |                     | <i>S.aureus</i>     | 100           | 100   | 100   | 50    |
|                          |                     | <i>B.cereus</i>     | 125           | 125   | 62.5  | 62.5  |
|                          |                     | <i>P.aeruginosa</i> | 125           | 125   | 62.5  | 62.5  |
|                          |                     | <i>A.niger</i>      | 125           | 125   | 62.5  | 62.5  |
|                          |                     | <i>A.flavus</i>     | 62.5          | 62.5  | 62.5  | 31.25 |
|                          |                     | <i>F.oxysporum</i>  | 125           | 125   | 62.5  | 62.5  |
|                          |                     | <i>R.stolonifer</i> | 125           | 125   | 31.25 | 31.25 |
|                          | Leaf                |                     | <i>E.coli</i> | 100   | 50    | 50    |
|                          |                     | <i>S.aureus</i>     | 100           | 100   | 50    | 25    |
|                          |                     | <i>B.cereus</i>     | 100           | 100   | 100   | 50    |
|                          |                     | <i>P.aeruginosa</i> | 100           | 50    | 50    | 50    |
|                          |                     | <i>A.niger</i>      | 100           | 100   | 12.5  | 12.5  |
|                          |                     | <i>A.flavus</i>     | 100           | 100   | 25    | 12.5  |
|                          |                     | <i>F.oxysporum</i>  | 100           | 25    | 25    | 1.56  |
|                          |                     | <i>R.stolonifer</i> | 100           | 25    | 25    | 1.56  |
| Stem                     |                     |                     | <i>E.coli</i> | 125   | 125   | 62.5  |
|                          |                     | <i>S.aureus</i>     | 125           | 125   | 125   | 62.5  |
|                          |                     | <i>B.cereus</i>     | 125           | 125   | 125   | 62.5  |
|                          |                     | <i>P.aeruginosa</i> | 125           | 125   | 125   | 125   |
|                          |                     | <i>A.niger</i>      | 62.5          | 62.5  | 31.25 | 15.62 |
|                          |                     | <i>A.flavus</i>     | 62.5          | 31.25 | 31.25 | 31.25 |
|                          |                     | <i>F.oxysporum</i>  | 125           | 62.5  | 62.5  | 31.25 |
|                          |                     | <i>R.stolonifer</i> | 125           | 62.5  | 31.25 | 15.62 |
|                          | Root                |                     | <i>E.coli</i> | 125   | 125   | 125   |
|                          |                     | <i>S.aureus</i>     | 125           | 125   | 125   | 125   |
|                          |                     | <i>B.cereus</i>     | 125           | 125   | 62.5  | 62.5  |
|                          |                     | <i>P.aeruginosa</i> | 125           | 62.5  | 31.25 | 31.25 |
|                          |                     | <i>A.niger</i>      | 125           | 125   | 62.5  | 62.5  |
|                          |                     | <i>A.flavus</i>     | 62.5          | 31.25 | 31.25 | 31.25 |
|                          |                     | <i>F.oxysporum</i>  | 125           | 125   | 125   | 62.5  |
|                          |                     | <i>R.stolonifer</i> | 62.5          | 62.5  | 31.25 | 15.62 |
| <i>Coleus forskohlii</i> |                     | Leaf                | <i>E.coli</i> | 25    | 25    | 12.5  |
|                          | <i>S.aureus</i>     |                     | 12.5          | 12.5  | 12.5  | 6.25  |
|                          | <i>B.cereus</i>     |                     | 1.5           | 1.5   | 1.5   | 1.5   |
|                          | <i>P.aeruginosa</i> |                     | 100           | 50    | 50    | 25    |
|                          | <i>A.niger</i>      |                     | 6.25          | 6.25  | 3.12  | 0.39  |
|                          | <i>A.flavus</i>     |                     | 12.5          | 3.125 | 0.78  | 0.39  |
|                          | <i>F.oxysporum</i>  |                     | 12.5          | 1.56  | 1.56  | 1.56  |

|                          |                     |                     |               |               |       |       |
|--------------------------|---------------------|---------------------|---------------|---------------|-------|-------|
|                          |                     | <i>R.stolonifer</i> | 25            | 25            | 25    | 25    |
| Stem                     |                     | <i>E.coli</i>       | 62.5          | 31.25         | 15.62 | 15.62 |
|                          |                     | <i>S.aureus</i>     | 15.62         | 15.62         | 7.81  | 7.81  |
|                          |                     | <i>B.cereus</i>     | 3.905         | 3.905         | 1.95  | 1.95  |
|                          |                     | <i>P.aeruginosa</i> | 125           | 125           | 125   | 125   |
|                          |                     | <i>A.niger</i>      | 7.81          | 7.81          | 3.905 | 1.95  |
|                          |                     | <i>A.flavus</i>     | 15.62         | 15.62         | 7.81  | 1.95  |
|                          |                     | <i>F.oxysporum</i>  | 15.62         | 15.62         | 7.81  | 7.81  |
|                          |                     | <i>R.stolonifer</i> | 62.5          | 62.5          | 31.25 | 31.25 |
|                          | Root                |                     | <i>E.coli</i> | 31.25         | 15.62 | 15.62 |
|                          |                     | <i>S.aureus</i>     | 15.62         | 7.81          | 7.81  | 7.81  |
|                          |                     | <i>B.cereus</i>     | 3.905         | 1.95          | 1.95  | 1.95  |
|                          |                     | <i>P.aeruginosa</i> | 62.5          | 62.5          | 62.5  | 31.25 |
|                          |                     | <i>A.niger</i>      | 15.62         | 7.81          | 3.905 | 1.95  |
|                          |                     | <i>A.flavus</i>     | 15.62         | 15.62         | 7.81  | 1.95  |
|                          |                     | <i>F.oxysporum</i>  | 15.62         | 15.62         | 15.62 | 7.81  |
|                          |                     | <i>R.stolonifer</i> | 31.25         | 31.25         | 31.25 | 31.25 |
| <i>Coleus zeylanicus</i> |                     | Leaf                | <i>E.coli</i> | 3.125         | 3.125 | 3.125 |
|                          | <i>S.aureus</i>     |                     | 100           | 100           | 100   | 100   |
|                          | <i>B.cereus</i>     |                     | 100           | 100           | 50    | 50    |
|                          | <i>P.aeruginosa</i> |                     | 50            | 50            | 50    | 50    |
|                          | <i>A.niger</i>      |                     | 0.39          | 0.39          | 0.39  | 0.39  |
|                          | <i>A.flavus</i>     |                     | 100           | 100           | 100   | 100   |
|                          | <i>F.oxysporum</i>  |                     | 0.78          | 0.78          | 0.78  | 0.78  |
|                          | <i>R.stolonifer</i> |                     | 25            | 25            | 25    | 12.5  |
|                          | Stem                |                     |               | <i>E.coli</i> | 7.81  | 7.81  |
|                          |                     | <i>S.aureus</i>     | 250           | 250           | 125   | 125   |
|                          |                     | <i>B.cereus</i>     | 125           | 125           | 125   | 62.5  |
|                          |                     | <i>P.aeruginosa</i> | 125           | 125           | 62.5  | 62.5  |
|                          |                     | <i>A.niger</i>      | 3.905         | 3.905         | 3.905 | 3.905 |
|                          |                     | <i>A.flavus</i>     | 125           | 125           | 62.5  | 62.5  |
|                          |                     | <i>F.oxysporum</i>  | 31.25         | 31.25         | 15.62 | 3.905 |
|                          |                     | <i>R.stolonifer</i> | 31.25         | 15.62         | 15.62 | 3.905 |
| Root                     |                     |                     | <i>E.coli</i> | 15.62         | 15.62 | 15.62 |
|                          |                     | <i>S.aureus</i>     | 250           | 250           | 250   | 125   |
|                          |                     | <i>B.cereus</i>     | 125           | 125           | 125   | 125   |
|                          |                     | <i>P.aeruginosa</i> | 250           | 250           | 250   | 125   |
|                          |                     | <i>A.niger</i>      | 7.81          | 7.81          | 3.905 | 3.905 |
|                          |                     | <i>A.flavus</i>     | 125           | 125           | 125   | 62.5  |
|                          |                     | <i>F.oxysporum</i>  | 125           | 125           | 125   | 62.5  |
|                          |                     | <i>R.stolonifer</i> | 62.5          | 31.25         | 31.25 | 15.62 |

724 **Table 2.** Anti-microbial activity of *Coleus* chloroform leaf, stem & root extracts in mg/ml.

| Plant species            | Plant part          | Strain name              | MIC Values mg/ml |               |          |        |      |
|--------------------------|---------------------|--------------------------|------------------|---------------|----------|--------|------|
|                          |                     |                          | Control          | Mild          | Moderate | Severe |      |
| <i>Coleus aromaticus</i> | Leaf                | <i>E.coli</i>            | 125              | 125           | 125      | 125    |      |
|                          |                     | <i>S.aureus</i>          | 62.5             | 62.5          | 62.5     | 31.25  |      |
|                          |                     | <i>B.cereus</i>          | 125              | 62.5          | 31.25    | 31.25  |      |
|                          |                     | <i>P.aeruginosa</i>      | 125              | 125           | 125      | 125    |      |
|                          |                     | <i>A.niger</i>           | 62.5             | ≤ 2           | ≤ 2      | ≤ 2    |      |
|                          |                     | <i>A.flavus</i>          | 125              | 125           | 62.5     | 62.5   |      |
|                          |                     | <i>F.oxysporum</i>       | 125              | 62.5          | 7.81     | 3.9    |      |
|                          |                     | <i>R.stolonifer</i>      | 62.5             | 3.9           | 1.9      | 1.9    |      |
|                          |                     | Stem                     | <i>E.coli</i>    | 125           | 125      | 125    | 125  |
|                          | <i>S.aureus</i>     |                          | 125              | 125           | 62.5     | 62.5   |      |
|                          | <i>B.cereus</i>     |                          | 125              | 125           | 62.5     | 62.5   |      |
|                          | <i>P.aeruginosa</i> |                          | 125              | 125           | 125      | 125    |      |
|                          | <i>A.niger</i>      |                          | 62.5             | 31.25         | 31.25    | 7.81   |      |
|                          | <i>A.flavus</i>     |                          | 62.5             | 31.25         | 31.25    | 7.81   |      |
|                          | <i>F.oxysporum</i>  |                          | 125              | 62.5          | 62.5     | 15.62  |      |
|                          | <i>R.stolonifer</i> |                          | 125              | 62.5          | 3.9      | 3.9    |      |
|                          | Root                |                          | <i>E.coli</i>    | 125           | 125      | 125    | 125  |
|                          |                     | <i>S.aureus</i>          | 250              | 125           | 125      | 62.5   |      |
|                          |                     | <i>B.cereus</i>          | 125              | 125           | 125      | 62.5   |      |
|                          |                     | <i>P.aeruginosa</i>      | 250              | 125           | 125      | 125    |      |
|                          |                     | <i>A.niger</i>           | 125              | 62.5          | 31.25    | 7.81   |      |
|                          |                     | <i>A.flavus</i>          | 125              | 125           | 62.5     | 31.25  |      |
|                          |                     | <i>F.oxysporum</i>       | 125              | 62.5          | 31.25    | 15.62  |      |
|                          |                     | <i>R.stolonifer</i>      | 125              | 125           | 31.25    | 3.9    |      |
|                          |                     | <i>Coleus amboinicus</i> | Leaf             | <i>E.coli</i> | 125      | 125    | 125  |
|                          | <i>S.aureus</i>     |                          |                  | 125           | 125      | 125    | 62.5 |
|                          | <i>B.cereus</i>     |                          |                  | 125           | 125      | 125    | 125  |
| <i>P.aeruginosa</i>      | 125                 |                          |                  | 62.5          | 62.5     | 62.5   |      |
| <i>A.niger</i>           | 62.5                |                          |                  | 7.81          | 7.81     | 7.81   |      |
| <i>A.flavus</i>          | 125                 |                          |                  | 62.5          | 62.5     | 62.5   |      |
| <i>F.oxysporum</i>       | 62.5                |                          |                  | 62.5          | 4        | 4      |      |
| <i>R.stolonifer</i>      | 125                 |                          |                  | 62.5          | 4        | 4      |      |
| Stem                     | <i>E.coli</i>       |                          |                  | 125           | 125      | 125    | 62.5 |
|                          | <i>S.aureus</i>     |                          | 125              | 125           | 62.5     | 31.25  |      |
|                          | <i>B.cereus</i>     |                          | 125              | 125           | 125      | 62.5   |      |
|                          | <i>P.aeruginosa</i> |                          | 125              | 125           | 62.5     | 62.5   |      |
|                          | <i>A.niger</i>      |                          | 62.5             | 31.25         | 31.25    | 15.62  |      |
|                          | <i>A.flavus</i>     |                          | 62.5             | 62.5          | 31.25    | 31.25  |      |
|                          | <i>F.oxysporum</i>  |                          | 125              | 62.5          | 15.62    | 7.81   |      |

|                          |      |                     |       |       |       |       |
|--------------------------|------|---------------------|-------|-------|-------|-------|
|                          |      | <i>R.stolonifer</i> | 125   | 125   | 7.81  | 4     |
|                          | Root | <i>E.coli</i>       | 125   | 125   | 125   | 125   |
|                          |      | <i>S.aureus</i>     | 125   | 125   | 62.5  | 62.5  |
|                          |      | <i>B.cereus</i>     | 125   | 125   | 62.5  | 15.62 |
|                          |      | <i>P.aeruginosa</i> | 125   | 125   | 125   | 62.5  |
|                          |      | <i>A.niger</i>      | 125   | 62.5  | 62.5  | 62.5  |
|                          |      | <i>A.flavus</i>     | 62.5  | 31.25 | 31.25 | 31.25 |
|                          |      | <i>F.oxysporum</i>  | 125   | 62.5  | 62.5  | 7.81  |
|                          |      | <i>R.stolonifer</i> | 125   | 62.5  | 7.81  | 4     |
| <i>Coleus barbatus</i>   | Leaf | <i>E.coli</i>       | 125   | 62.5  | 62.5  | 62.5  |
|                          |      | <i>S.aureus</i>     | 125   | 125   | 125   | 62.5  |
|                          |      | <i>B.cereus</i>     | 125   | 125   | 125   | 125   |
|                          |      | <i>P.aeruginosa</i> | 125   | 125   | 125   | 125   |
|                          |      | <i>A.niger</i>      | 125   | 62.5  | 31.25 | 15.62 |
|                          |      | <i>A.flavus</i>     | 125   | 125   | 62.5  | 62.5  |
|                          |      | <i>F.oxysporum</i>  | 250   | 250   | 125   | 125   |
|                          |      | <i>R.stolonifer</i> | 125   | 62.5  | 62.5  | 31.25 |
|                          | Stem | <i>E.coli</i>       | 125   | 125   | 62.5  | 62.5  |
|                          |      | <i>S.aureus</i>     | 125   | 125   | 62.5  | 62.5  |
|                          |      | <i>B.cereus</i>     | 250   | 125   | 125   | 125   |
|                          |      | <i>P.aeruginosa</i> | 125   | 125   | 125   | 125   |
|                          |      | <i>A.niger</i>      | 62.5  | 62.5  | 31.25 | 15.62 |
|                          |      | <i>A.flavus</i>     | 62.5  | 31.25 | 31.25 | 31.25 |
|                          |      | <i>F.oxysporum</i>  | 250   | 125   | 125   | 125   |
|                          |      | <i>R.stolonifer</i> | 125   | 31.25 | 31.25 | 7.81  |
|                          | Root | <i>E.coli</i>       | 125   | 125   | 31.25 | 31.25 |
|                          |      | <i>S.aureus</i>     | 250   | 125   | 125   | 62.5  |
|                          |      | <i>B.cereus</i>     | 125   | 125   | 62.5  | 62.5  |
|                          |      | <i>P.aeruginosa</i> | 250   | 250   | 250   | 250   |
|                          |      | <i>A.niger</i>      | 125   | 62.5  | 62.5  | 15.62 |
|                          |      | <i>A.flavus</i>     | 62.5  | 31.25 | 31.25 | 15.62 |
|                          |      | <i>F.oxysporum</i>  | 250   | 62.5  | 31.25 | 31.25 |
|                          |      | <i>R.stolonifer</i> | 125   | 125   | 31.25 | 7.81  |
| <i>Coleus forskohlii</i> | Leaf | <i>E.coli</i>       | 125   | 62.5  | 31.25 | 1.95  |
|                          |      | <i>S.aureus</i>     | 125   | 62.5  | 62.5  | 15.62 |
|                          |      | <i>B.cereus</i>     | 125   | 62.5  | 1.95  | 0.97  |
|                          |      | <i>P.aeruginosa</i> | 125   | 62.5  | 62.5  | 31.25 |
|                          |      | <i>A.niger</i>      | 31.25 | 31.25 | 15.62 | 0.48  |
|                          |      | <i>A.flavus</i>     | 62.5  | 31.25 | 31.25 | 15.62 |
|                          |      | <i>F.oxysporum</i>  | 31.25 | 31.25 | 31.25 | 31.25 |
|                          |      | <i>R.stolonifer</i> | 62.5  | 62.5  | 31.25 | 15.62 |

|                          |       |                     |       |               |       |       |
|--------------------------|-------|---------------------|-------|---------------|-------|-------|
|                          | Stem  | <i>E.coli</i>       | 125   | 125           | 31.25 | 7.81  |
|                          |       | <i>S.aureus</i>     | 125   | 125           | 62.5  | 31.25 |
|                          |       | <i>B.cereus</i>     | 62.5  | 62.5          | 7.81  | 3.9   |
|                          |       | <i>P.aeruginosa</i> | 125   | 125           | 62.5  | 31.25 |
|                          |       | <i>A.niger</i>      | 62.5  | 62.5          | 31.25 | 15.62 |
|                          |       | <i>A.flavus</i>     | 62.5  | 31.25         | 31.25 | 15.62 |
|                          |       | <i>F.oxysporum</i>  | 62.5  | 31.25         | 31.25 | 15.62 |
|                          |       | <i>R.stolonifer</i> | 31.25 | 31.25         | 15.62 | 15.62 |
|                          |       |                     | Root  | <i>E.coli</i> | 125   | 31.25 |
| <i>S.aureus</i>          | 62.5  |                     |       | 62.5          | 31.25 | 31.25 |
| <i>B.cereus</i>          | 62.5  |                     |       | 31.25         | 7.81  | 3.9   |
| <i>P.aeruginosa</i>      | 125   |                     |       | 62.5          | 31.25 | 31.25 |
| <i>A.niger</i>           | 62.5  |                     |       | 31.25         | 15.62 | 15.62 |
| <i>A.flavus</i>          | 62.5  |                     |       | 31.25         | 31.25 | 7.81  |
| <i>F.oxysporum</i>       | 125   |                     |       | 62.5          | 15.62 | 7.81  |
| <i>R.stolonifer</i>      | 62.5  |                     |       | 31.25         | 7.81  | 7.81  |
| <i>Coleus zeylanicus</i> | Leaf  |                     |       | <i>E.coli</i> | 31.25 | 3.9   |
|                          |       | <i>S.aureus</i>     | 125   | 125           | 62.5  | 62.5  |
|                          |       | <i>B.cereus</i>     | 125   | 125           | 62.5  | 62.5  |
|                          |       | <i>P.aeruginosa</i> | 62.5  | 62.5          | 31.25 | 31.25 |
|                          |       | <i>A.niger</i>      | 0.97  | 0.97          | 0.97  | 0.48  |
|                          |       | <i>A.flavus</i>     | 125   | 125           | 62.5  | 31.25 |
|                          |       | <i>F.oxysporum</i>  | 62.5  | 31.25         | 31.25 | 15.62 |
|                          |       | <i>R.stolonifer</i> | 31.25 | 31.25         | 15.62 | 7.81  |
|                          |       |                     | Stem  | <i>E.coli</i> | 62.5  | 31.25 |
| <i>S.aureus</i>          | 125   |                     |       | 62.5          | 62.5  | 31.25 |
| <i>B.cereus</i>          | 125   |                     |       | 125           | 125   | 62.5  |
| <i>P.aeruginosa</i>      | 125   |                     |       | 62.5          | 31.25 | 31.25 |
| <i>A.niger</i>           | 31.25 |                     |       | 15.62         | 15.62 | 0.97  |
| <i>A.flavus</i>          | 125   |                     |       | 125           | 31.25 | 31.25 |
| <i>F.oxysporum</i>       | 31.25 |                     |       | 31.25         | 15.62 | 15.62 |
| <i>R.stolonifer</i>      | 62.5  |                     |       | 31.25         | 31.25 | 15.62 |
|                          | Root  |                     |       | <i>E.coli</i> | 125   | 62.5  |
|                          |       | <i>S.aureus</i>     | 125   | 125           | 62.5  | 62.5  |
|                          |       | <i>B.cereus</i>     | 125   | 125           | 62.5  | 62.5  |
|                          |       | <i>P.aeruginosa</i> | 250   | 125           | 125   | 62.5  |
|                          |       | <i>A.niger</i>      | 62.5  | 31.25         | 15.62 | 0.97  |
|                          |       | <i>A.flavus</i>     | 62.5  | 62.5          | 62.5  | 62.5  |
|                          |       | <i>F.oxysporum</i>  | 62.5  | 62.5          | 31.25 | 15.62 |
|                          |       | <i>R.stolonifer</i> | 62.5  | 31.25         | 15.62 | 15.62 |

726

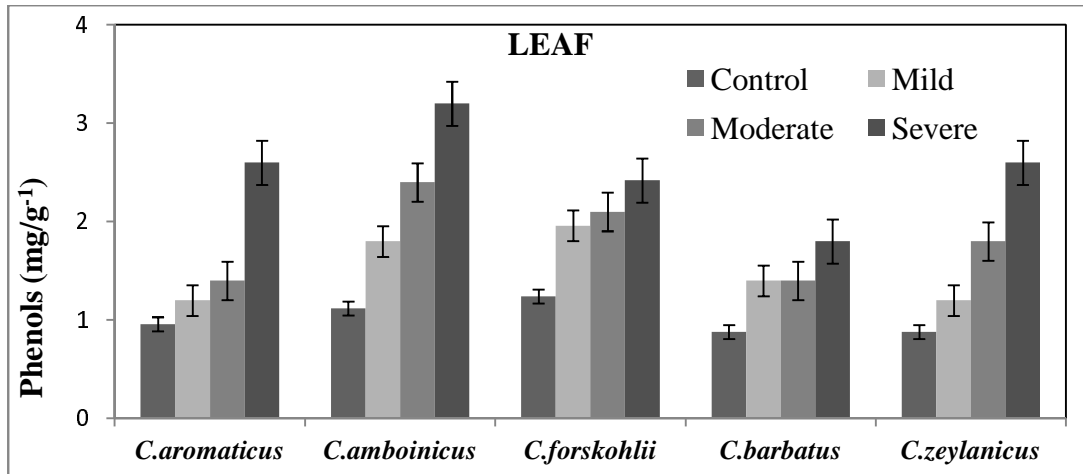

727

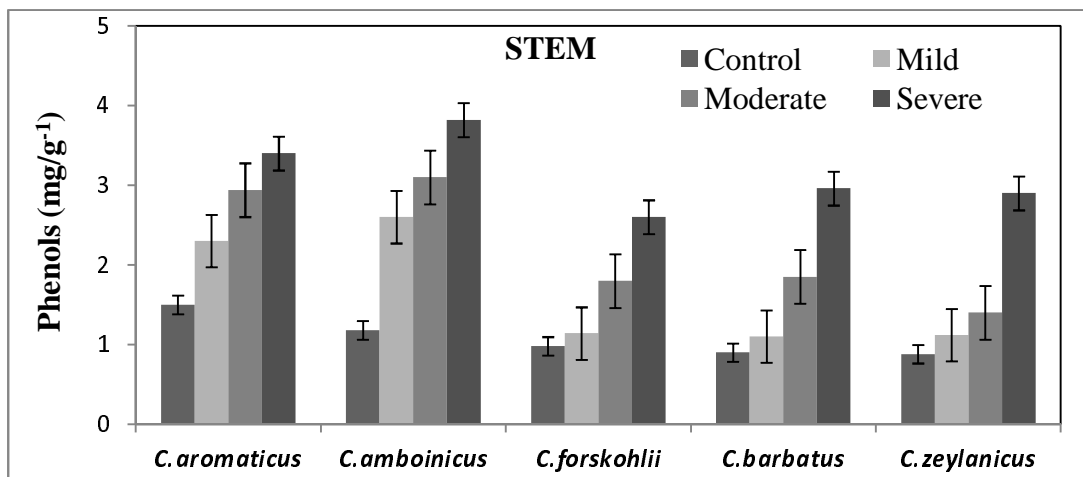

728

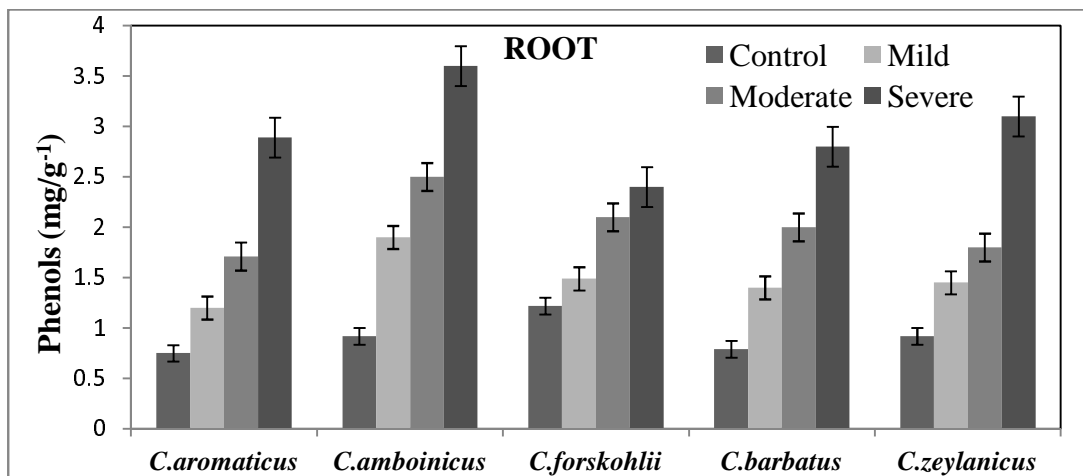

729 **Fig. 1.** Quantitative determination of phenols in leaf, stem and root of five different  
730 *Coleus* species under normal and saline conditions. Each point is an average of five  
731 independent determinations  $\pm$  SE, ( $t_{(4)} = 0.1, p \leq 0.05$ ).



732

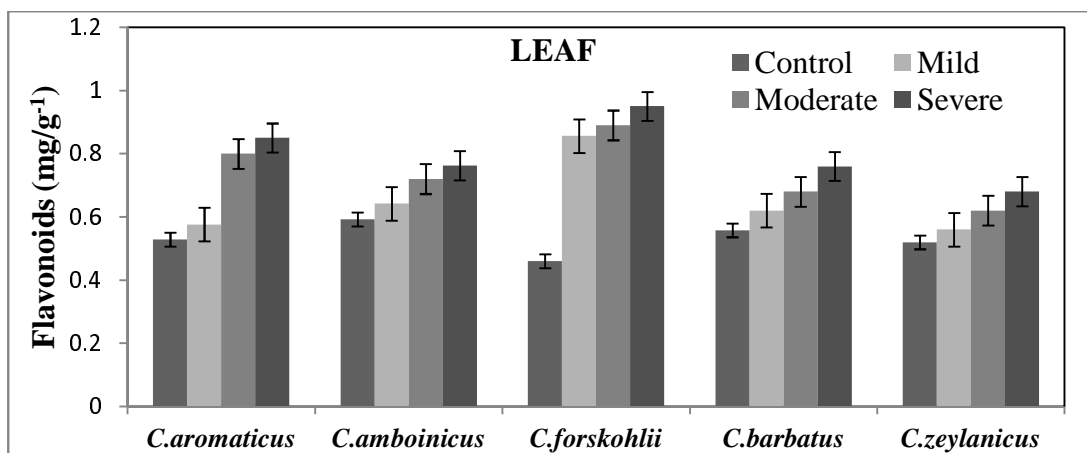

733

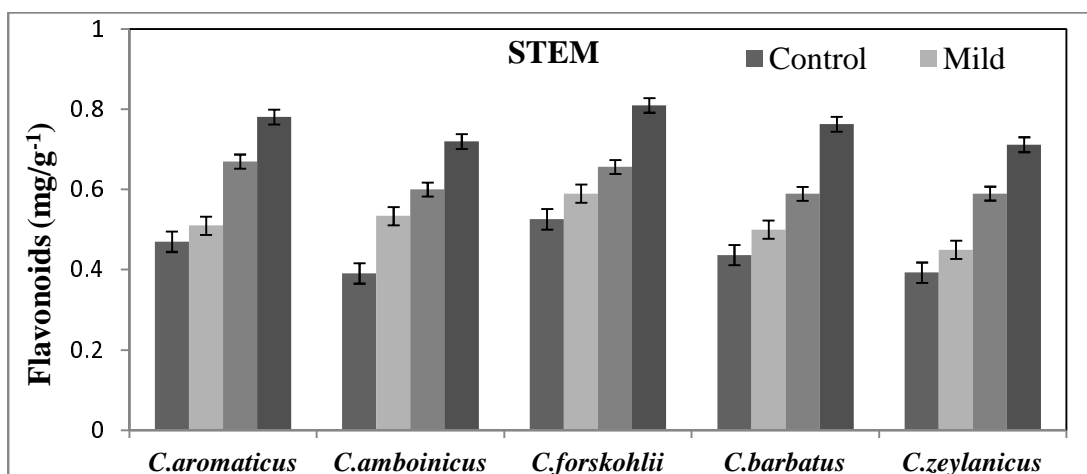

734

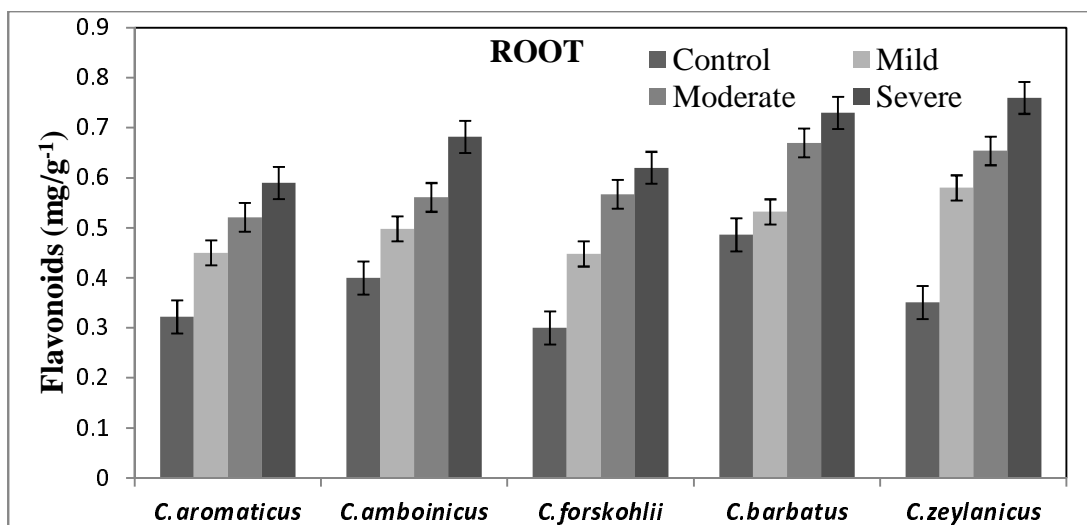

735 **Fig. 2.** Quantitative determination of flavonoids in leaf, stem and root of five different  
 736 *Coleus* species under normal and saline conditions. Each point is an average of five  
 737 independent determinations  $\pm$  SE, ( $t_{(4)}=0.10$ ,  $p \square 0.05$ ).

738

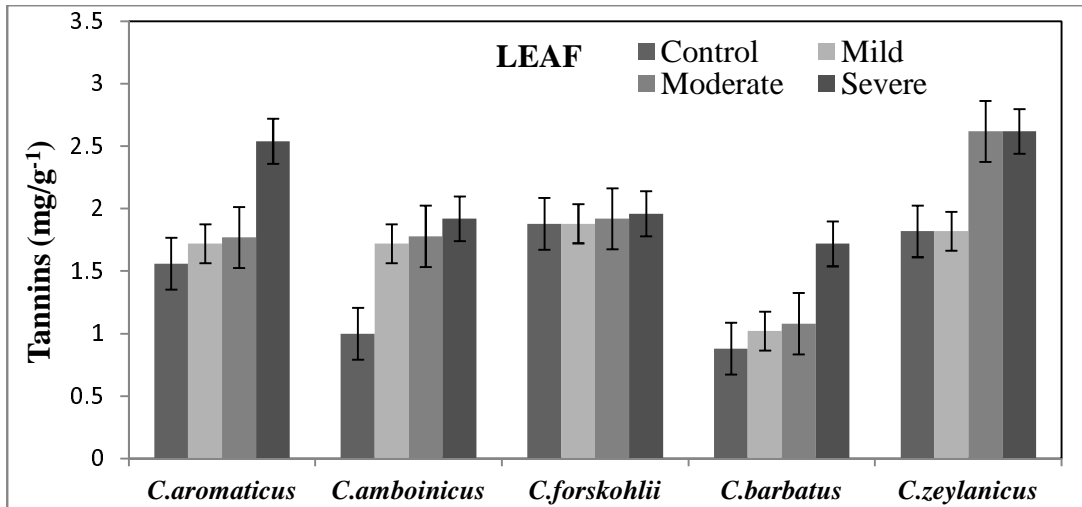

739

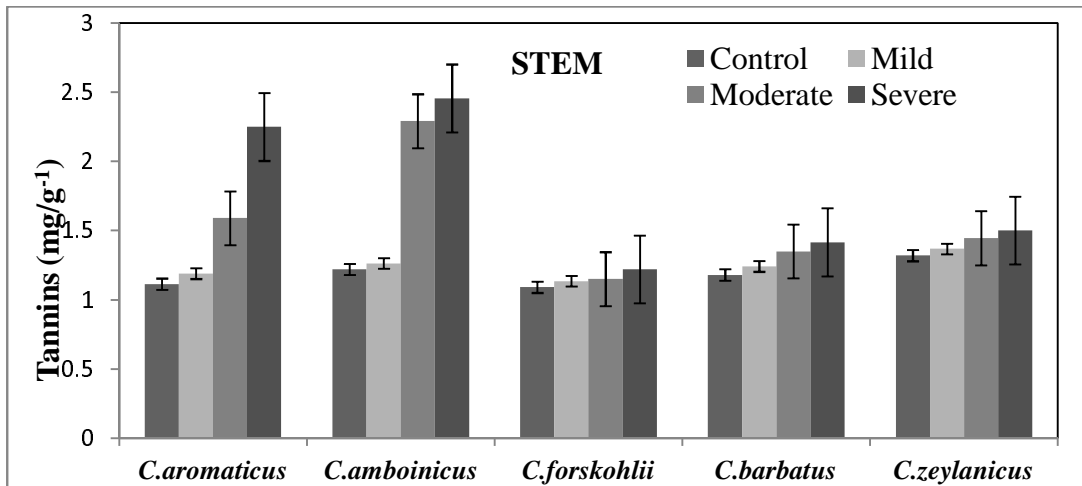

740

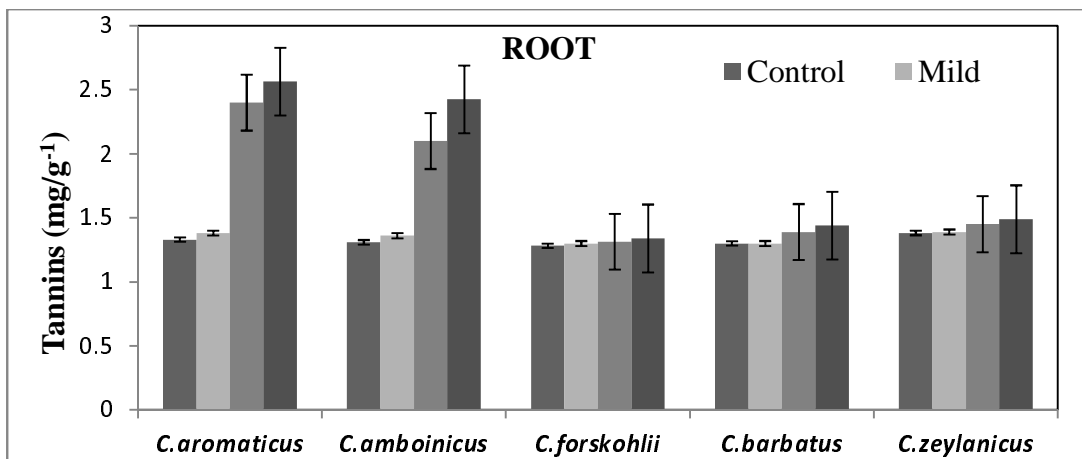

741 **Fig. 3.** Quantitative determination of tannins in leaf, stem and root of five different  
742 *Coleus* species under normal and saline conditions. Each point is an average of five  
743 independent determinations  $\pm$  SE, ( $t_{(4)} = 0.28, p \square 0.05$ ).

744

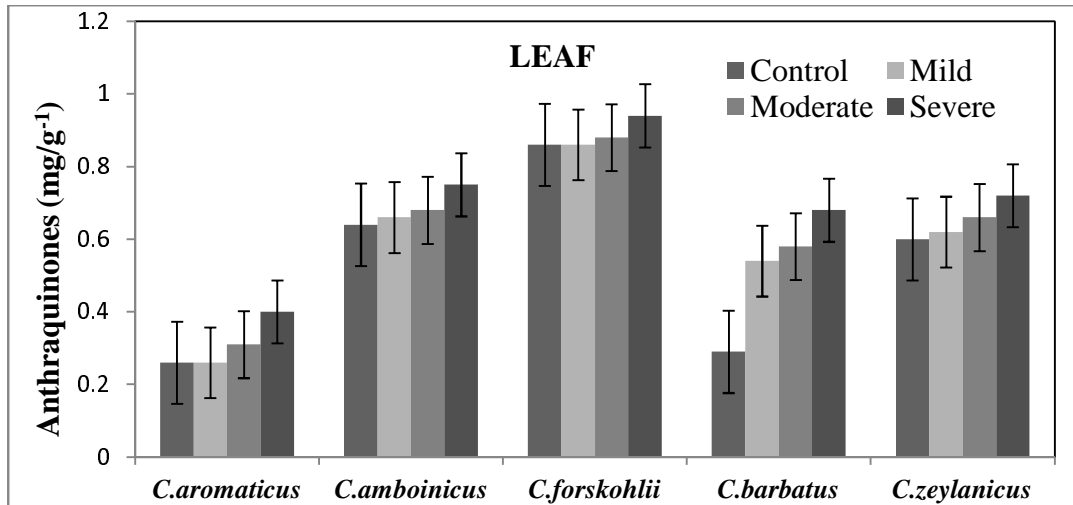

745

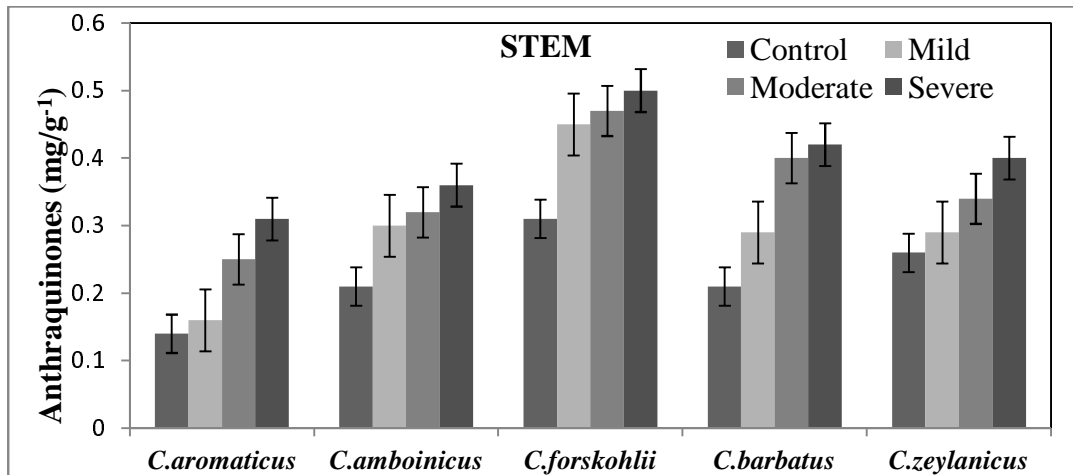

746

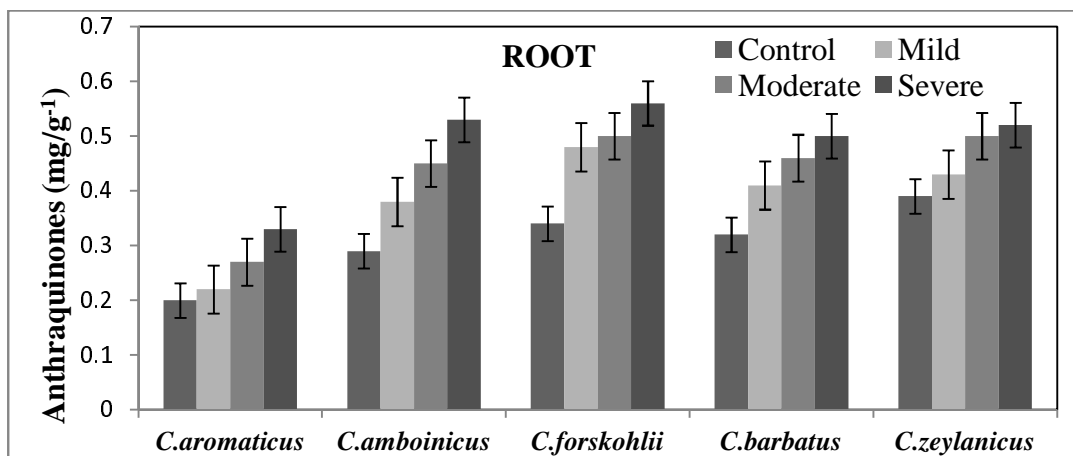

747 **Fig. 4.** Quantitative determination of anthraquinones in leaf, stem and root of five  
748 different *Coleus* species under normal and saline conditions. Each point is an average of  
749 five independent determinations  $\pm$  SE, ( $t_{(4)}=0.32$ ,  $p \square 0.05$ ).

750

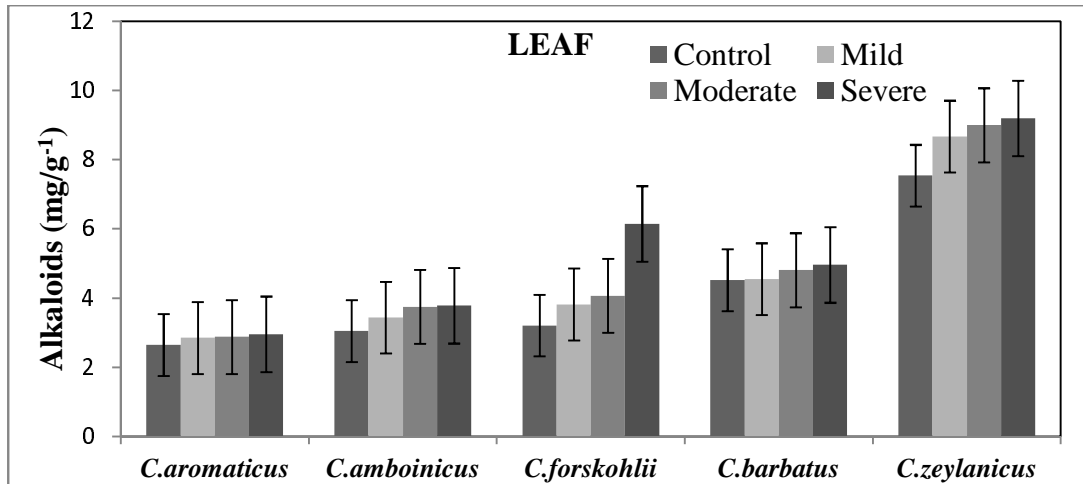

751

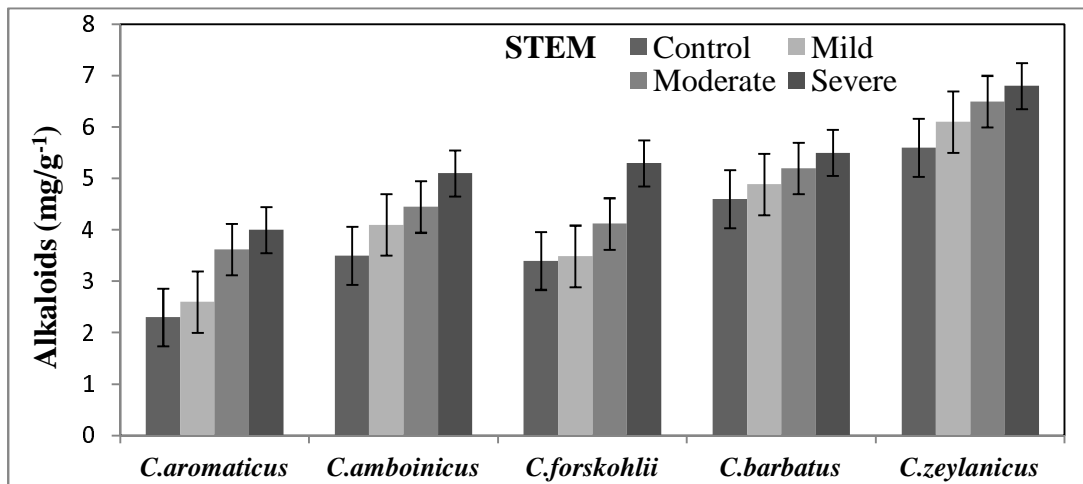

752

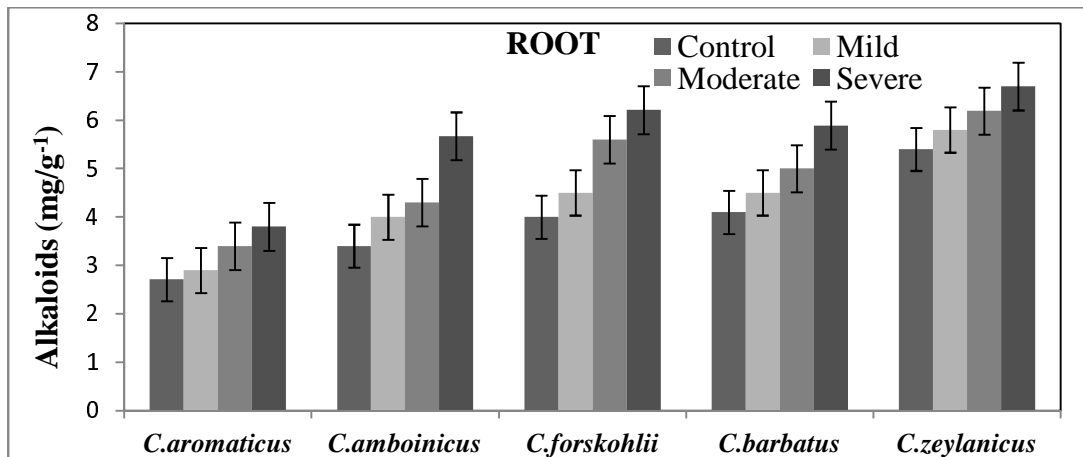

753 **Fig. 5.** Quantitative determination of alkaloids in leaf, stem and root of five different  
754 *Coleus* species under normal and saline conditions. Each point is an average of five  
755 independent determinations  $\pm$  SE, ( $t_{(4)} = 0.46, p \geq 0.05$ ).

756

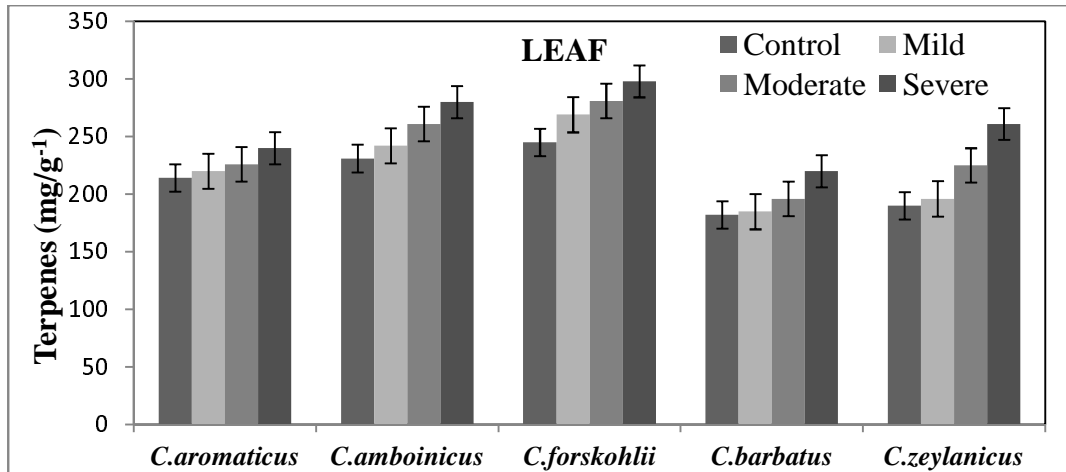

757

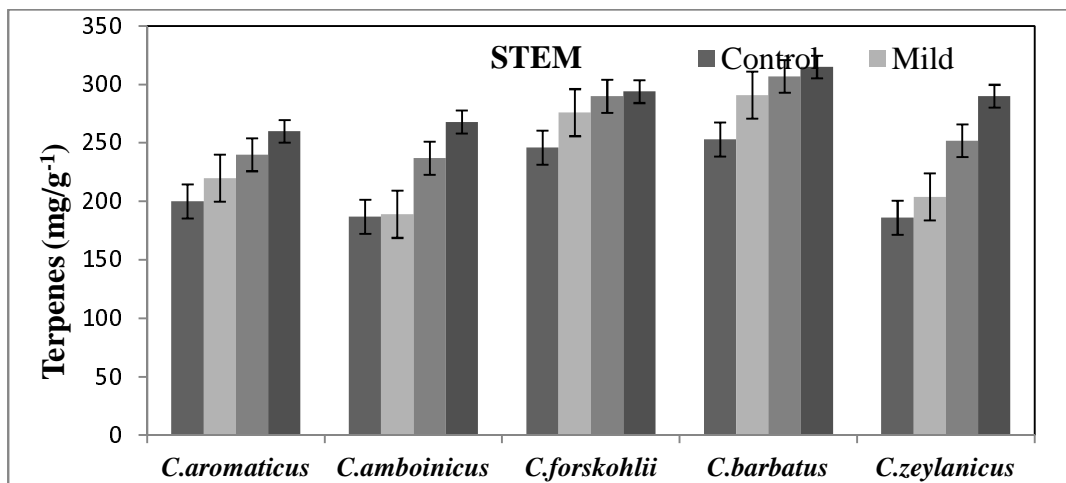

758

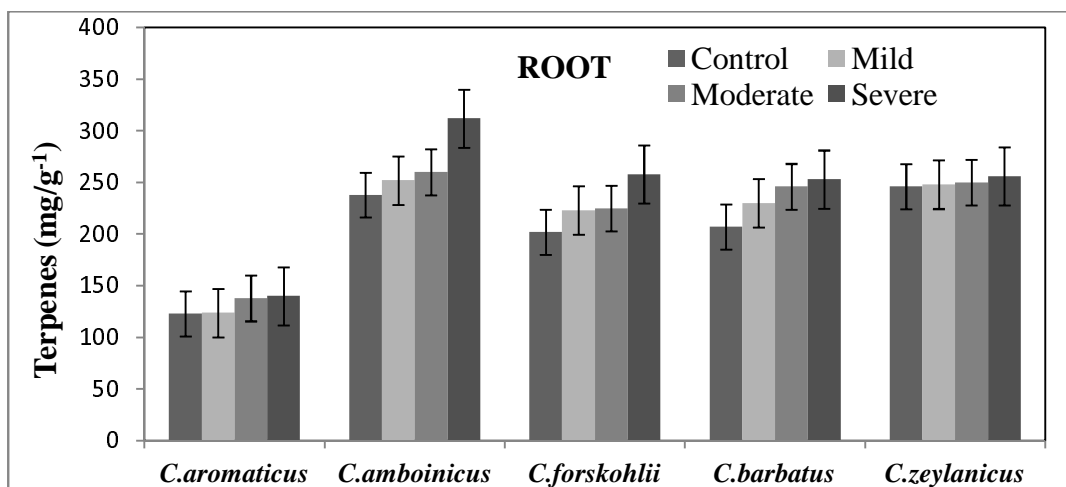

759 **Fig. 6.** Quantitative determination of terpenes in leaf, stem and root of five different *Coleus*  
760 species under normal and saline conditions. Each point is an average of five independent  
761 determinations  $\pm$  SE, ( $t_{(4)} = 3.14$ ,  $p \leq 0.05$ ).

762

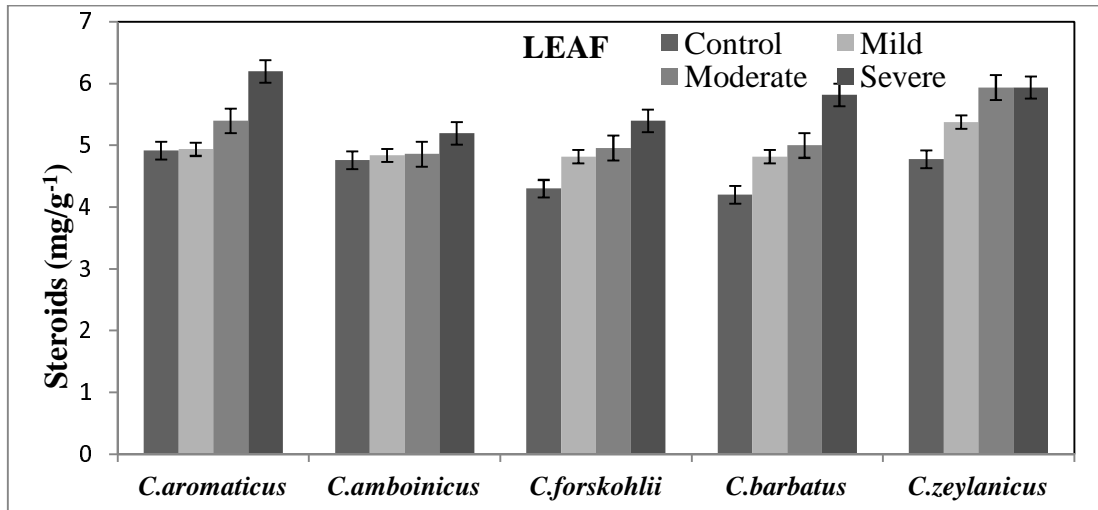

763

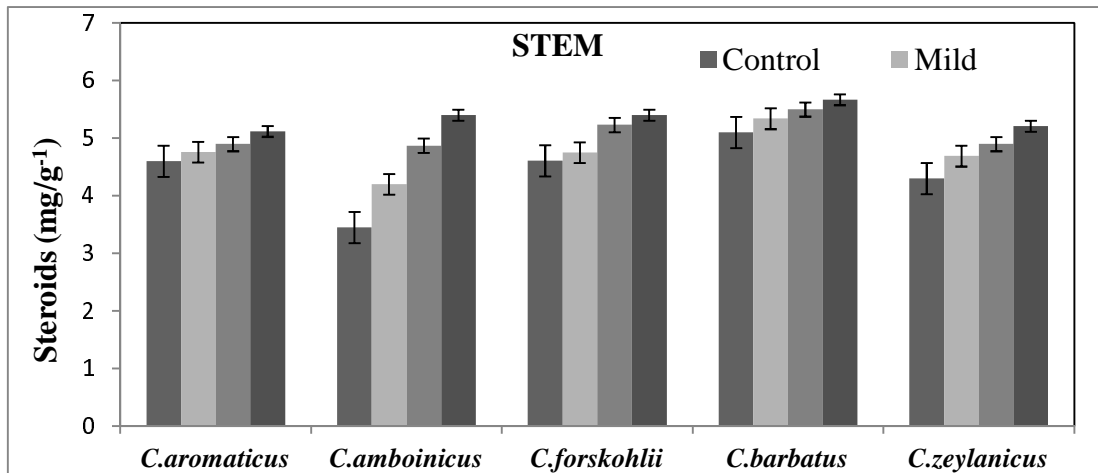

764

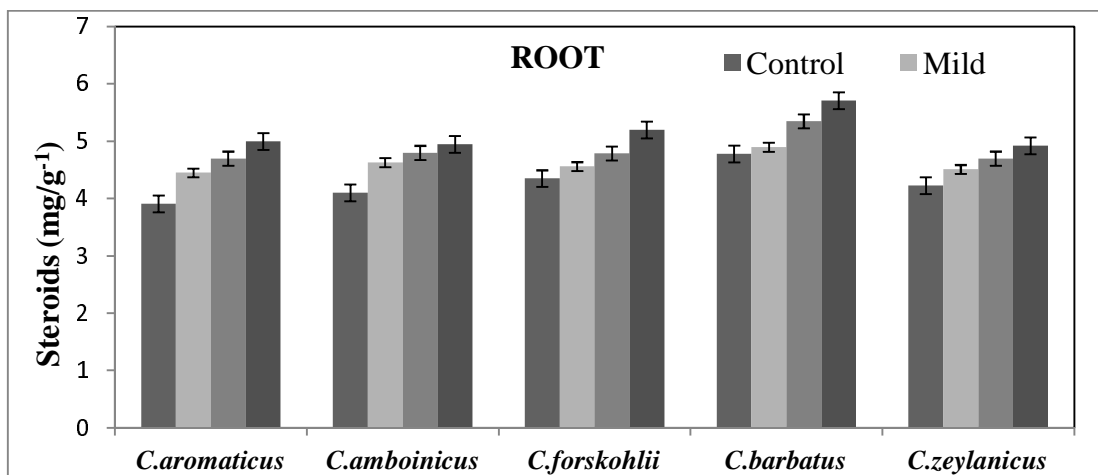

765 **Fig. 7.** Quantitative determination of steroids in leaf, stem and root of five different *Coleus*  
766 species under normal and saline conditions. Each point is an average of five independent  
767 determinations  $\pm$  SE, ( $t_{(4)} = 0.92$ ,  $p \geq 0.05$ ).

768

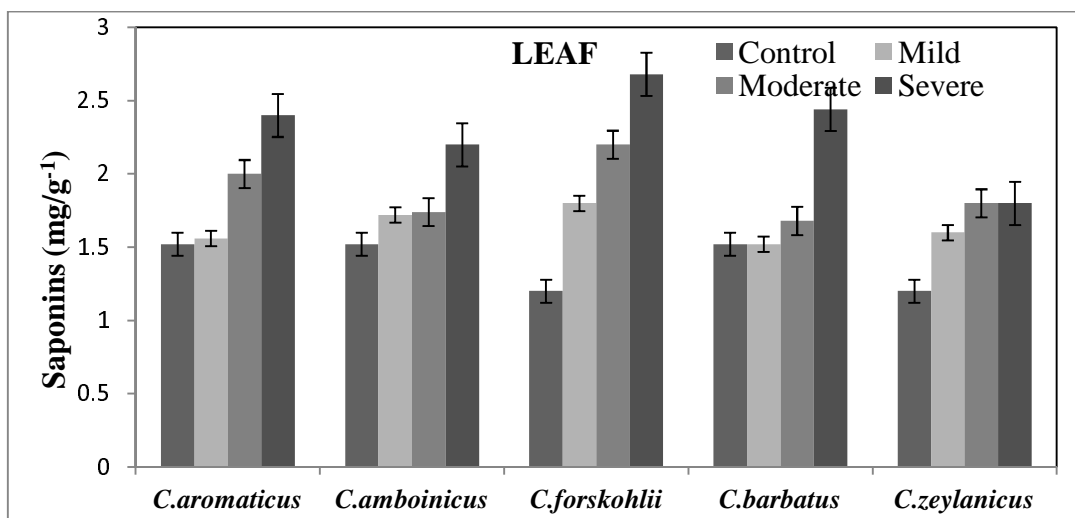

769

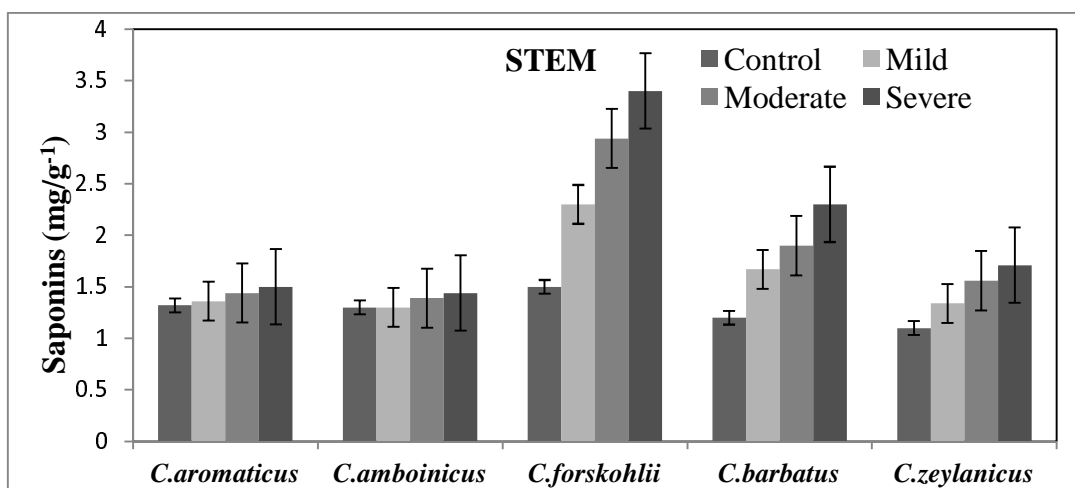

770

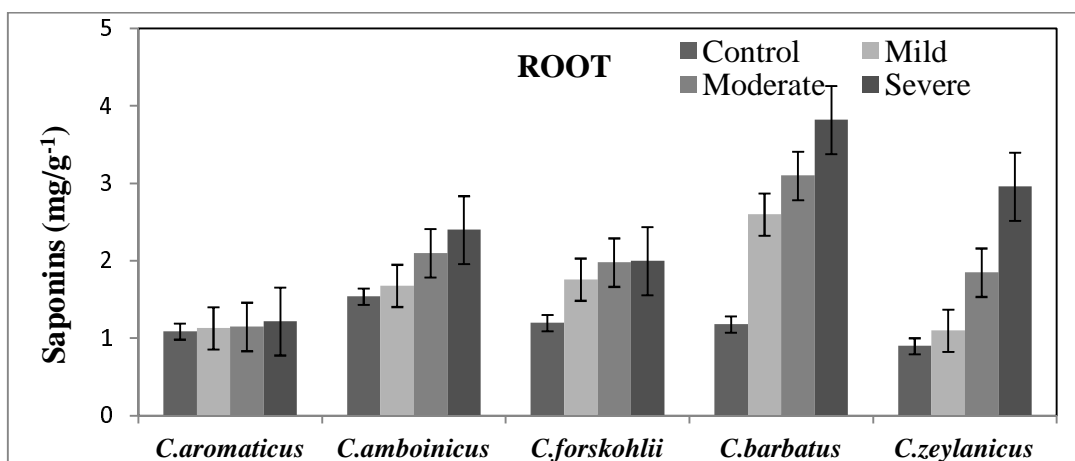

771 **Fig. 8.** Quantitative determination of saponins in leaf, stem and root of five different  
772 *Coleus* species under normal and saline conditions. Each point is an average of five  
773 independent determinations  $\pm$  SE, ( $t_{(4)}=0.4$ ,  $p \geq 0.05$ ).

774

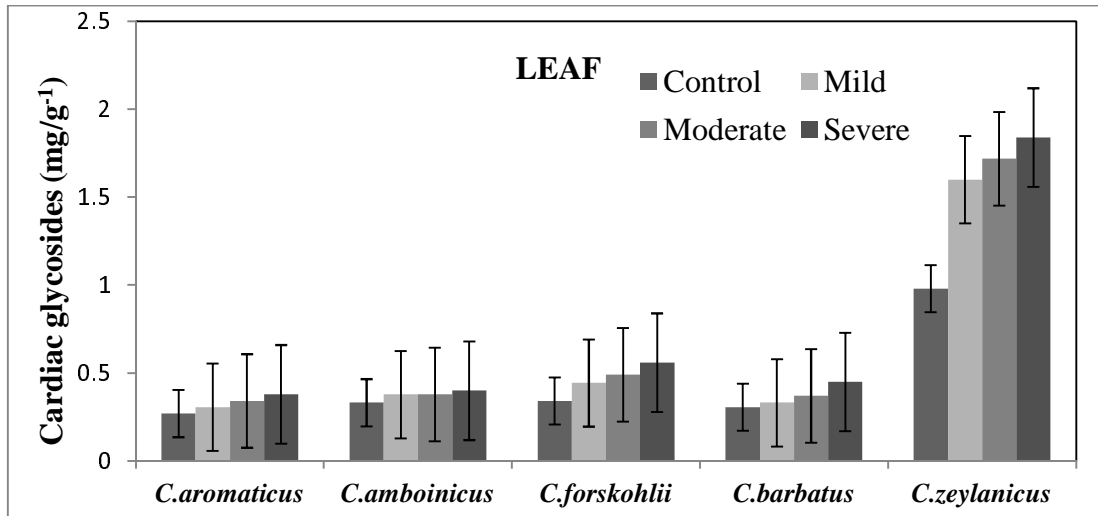

775

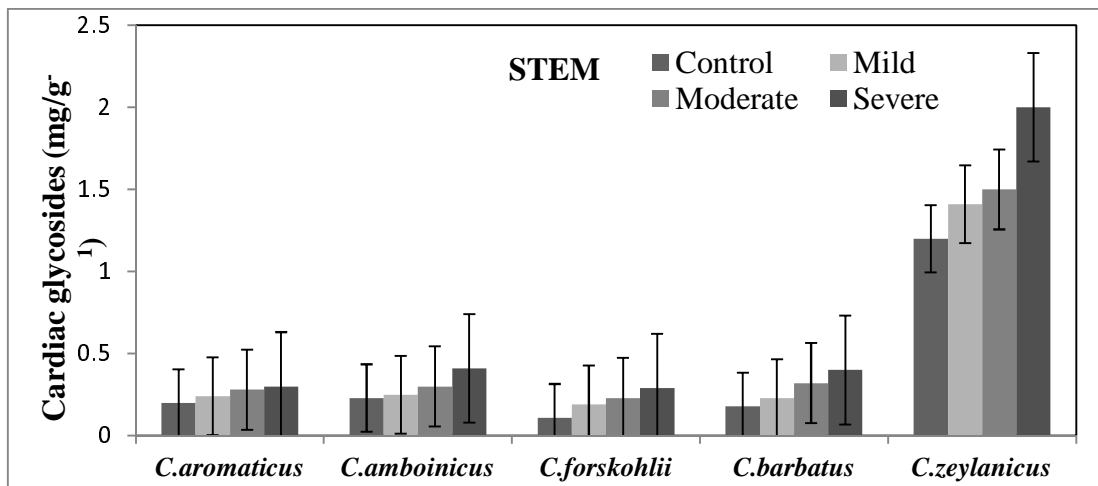

776

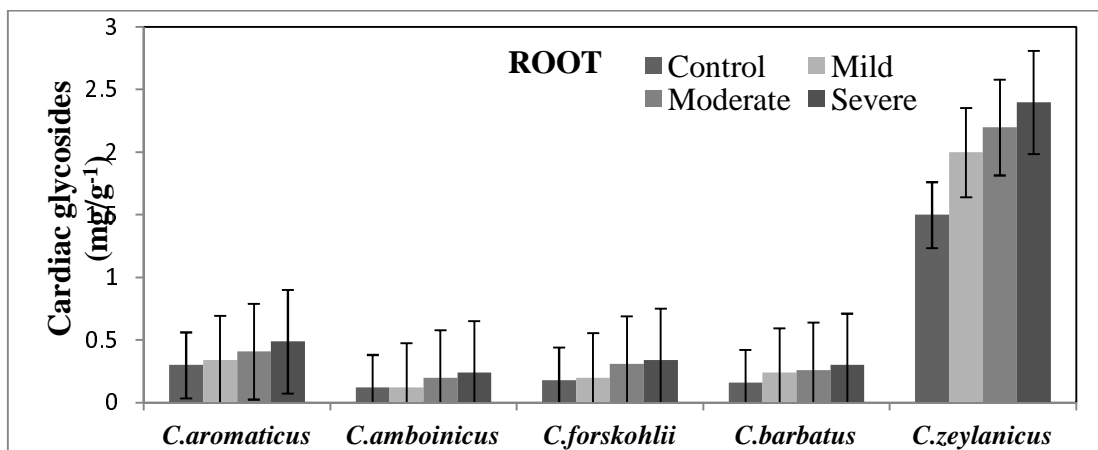

777 **Fig. 9.** Quantitative determination of cardiac glycosides in leaf, stem and root of five  
 778 different *Coleus* species under normal and saline conditions. Each point is an average of  
 779 five independent determinations  $\pm$  SE, ( $t_{(4)}=0.1, p \leq 0.05$ ).



780

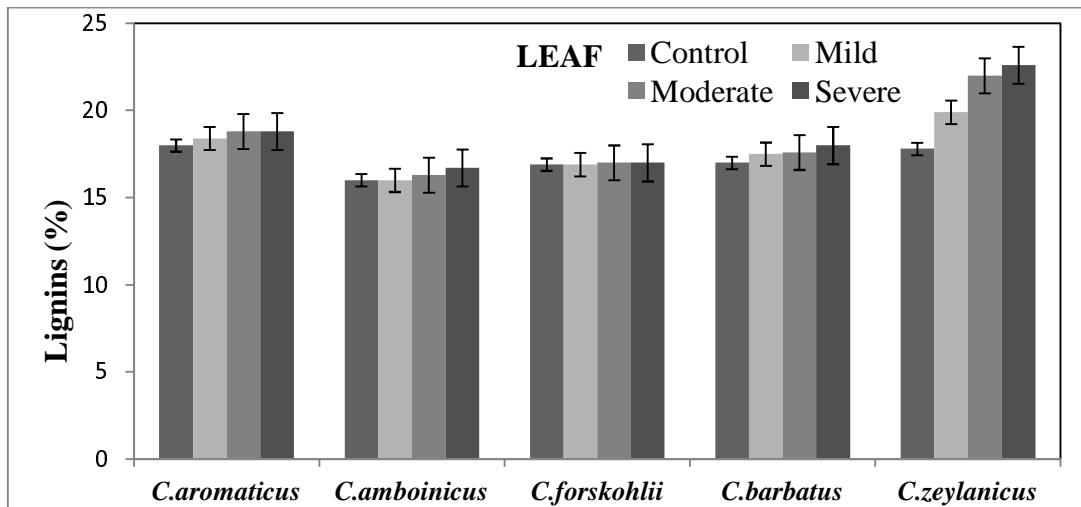

781

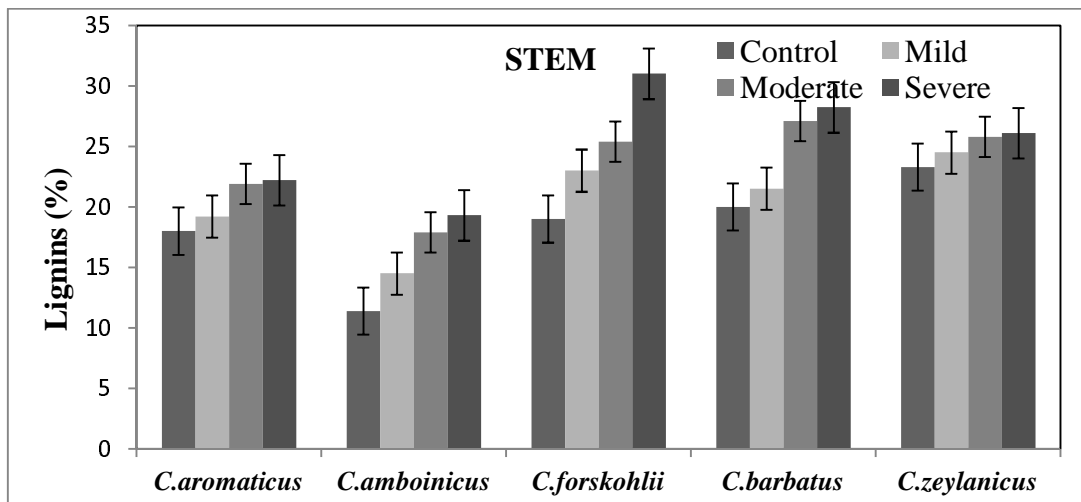

782

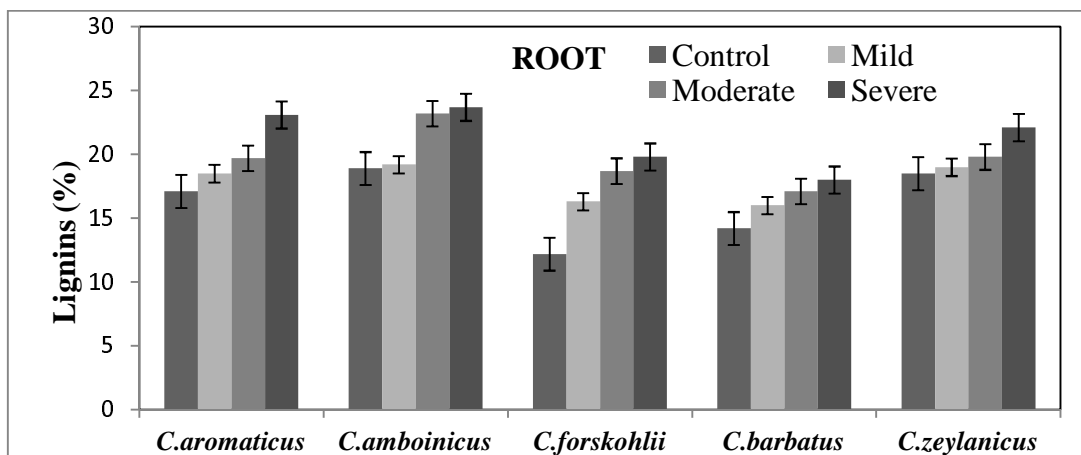

783 **Fig. 10.** Quantitative determination of lignins in leaf, stem and root of five different *Coleus*  
 784 species under normal and saline conditions. Each point is an average of five independent  
 785 determinations  $\pm$  SE, ( $t_{(4)} = 0.80, p \square 0.05$ ).
